# Supplementary material for: Competitive affinity-based proteome profiling and imaging to reveal potential cellular targets of betulinic acid
Source: Royal Society of Chemistry journal article supplement (doi:10.1039/c7cc04190j), 2017-01-01

## Supporting Information

### Competitive affinity-based proteome profiling and imaging to reveal potential cellular targets of betulinic acid

Haijun Guo,<sup>a</sup> Jiaqian Xu,<sup>a</sup> Piliang Hao,<sup>\*b</sup> Ke Ding<sup>\* a</sup> and Zhengqiu Li <sup>\* a</sup>

College of Pharmacy, Jinan University, Guangzhou, China

\*Corresponding author (pharmlzq@jnu.edu.cn, dingke@jnu.edu.cn, haopl@shanghaitech.edu.cn)

#### 1. General information

All chemicals were purchased from commercial vendors and used without further purification, unless indicated otherwise. All reactions requiring anhydrous conditions were carried out under argon or nitrogen atmosphere using oven-dried glassware. Reaction progress was monitored by TLC on pre-coated silica plates (Qingdao Huanghai F<sub>254</sub> nm, 0.25 μm) and spots were visualized by UV, iodine or other suitable stains. Flash column chromatography was carried out using silica gel (Qingdao Huanghai F<sub>254</sub> nm, 0.040-0.063 μm). All NMR spectra (<sup>1</sup>H-NMR, <sup>13</sup>C-NMR) were recorded on Bruker 300 MHz/400 MHz NMR spectrometers. Chemical shifts were reported in parts per million (ppm) referenced with respect to appropriate internal standards or residual solvent peaks (CDCl<sub>3</sub> = 7.26 ppm, DMSO-*d*<sub>6</sub> = 2.50 ppm). The following abbreviations were used in reporting spectra, br s (broad singlet), s (singlet), d (doublet), t (triplet), q (quartet), m (multiplet), dd (doublet of doublets). In-gel fluorescence scanning of the SDS-PAGE gels was carried out with Typhoon 9500 fluorescence gel scanner (Amersham Biosciences), the click chemistry ligand tris[(1-benzyl-1H-1,2,3-triazol-4-yl)methyl]amine (TBTA) were purchased from Sigma-Aldrich. TAMRA-Azide (Cat # AZ109) and TAMRA-Biotin-Azide (Cat # 1048) were purchased from Click Chemistry Tools (<https://www.clickchemistrytools.com>). Antibodies against PGK1 (ab199438), ACAT1 (ab171630), Topoisomerase (ab109374), C3 (ab181147), PFKFB1 (ab72590) and the recombinant human PGK1 protein (ab87630) were purchased from Abcam. Antibody against APOL2 (25925-1-AP) was purchased from Proteintech. Antibodies against AIF (4642) and NF-κB (8242t) were purchased from CST.

#### Cell culture and Western blot

Cell lines were obtained from the National Cancer Institute Developmental Therapeutics Program (NCI-60). MCF-7 cells were cultured in Dulbecco's modified Eagle medium (DMEM, high glucose pyruvate, Thermo Scientific) containing 10% heat-inactivated fetal bovine serum (FBS; Gibico), 100 units/mL penicillin, and 100 μg/mL streptomycin (Thermo Scientific) and maintained in a humidified 37 °C incubator with 5% CO<sub>2</sub>. To generate protein lysates, cells were washed twice with cold phosphate-buffered saline (PBS), harvested with 1× trypsin or by use of a cell scraper, and collected by centrifugation. Cell pellets were then washed with PBS and lysed with N-(2-hydroxyethyl)piperazine-N'-2-ethanesulfonic acid (HEPES) buffer (25 mM HEPES, 150 mM NaCl, and 2 mM MgCl<sub>2</sub>, pH 7.5) containing 0.5% NP-40. Protein concentration was determined by Bradford protein assay. For Western blotting experiments, samples from MCF-7 cells were resolved by SDS-polyacrylamide gels and transferred to poly(vinylidene difluoride) membranes. Membranes were then blocked with 3% bovine serum albumin (BSA) in TBST (0.1% Tween in Tris-buffered saline) for 1 h at room temperature. After blocking, membranes were incubated with the corresponding primary antibody for another hour. After incubation, membranes were washed with TBST (4×10 min) and then incubated with an appropriate secondary antibody. Finally, blots were washed again with TBST before being developed with SuperSignal West Dura Kit (Thermo Scientific). Proteome labeling, in-gel fluorescence scanning and bioimaging experiments were

performed as previously reported.<sup>[1,2,3]</sup>

## 2. Structures of probes and reporters used in the current study

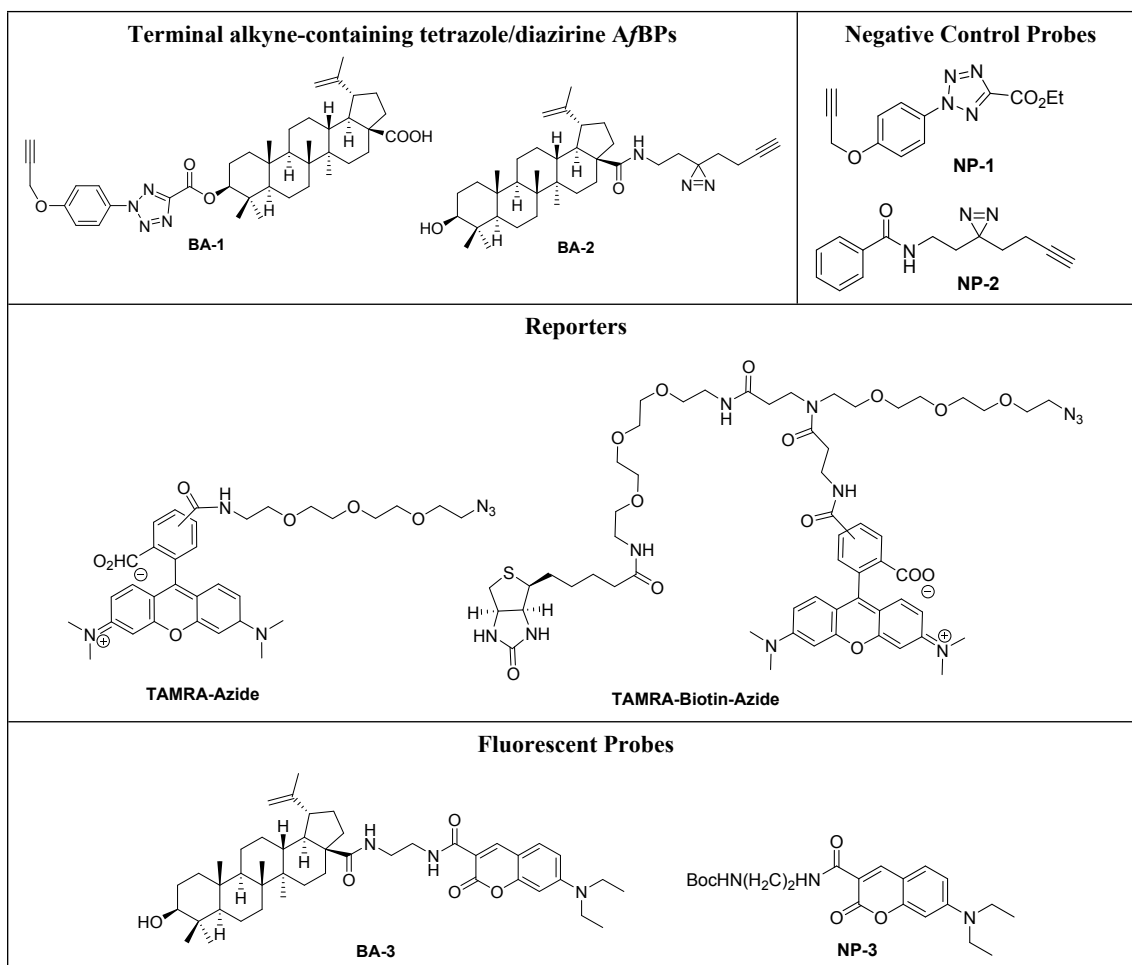

## 3. Chemical Synthesis

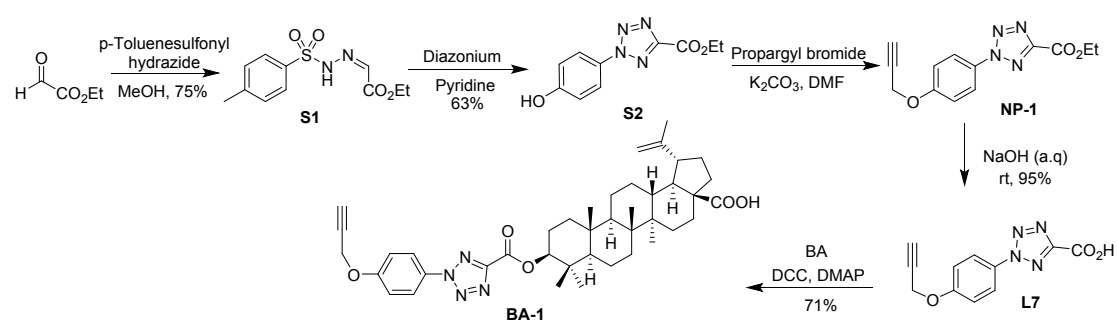

**Scheme S1**

(**S1**). S1 was synthesized based on previously published procedures.<sup>[4]</sup> <sup>1</sup>H NMR (400 MHz, CDCl<sub>3</sub>) δ 12.11 (s, 1H), 7.83 (d, *J* = 7.6 Hz, 2H), 7.33 (d, *J* = 7.8 Hz, 2H), 6.81 (s, 1H), 4.24 (q, *J* = 7.2 Hz, 2H), 2.45 (s, 3H), 1.33 (t, *J* = 7.1 Hz, 3H). LC-MS (ESI): *m/z* [M+1]<sup>+</sup> calcd: 207.11; Found : 207.13.

(**S2**). Synthesis of the diazonium salt was based on previously published procedures.<sup>[5]</sup> The freshly prepared diazonium salt solution (10 mmol) was added dropwise, over a period of 30 min, to a stirred solution of phenylsulfonylhydrazine (2.7 g, 10 mmol) in 20 mL pyridine at -5 °C. The resulting mixture was stirred for 2 h at -

5 °C and then further 2 h at room temperature. The reaction mixture was diluted with 10 mL H<sub>2</sub>O and 30 mL EtOAc. The organic phase was separated and washed with 1 N HCl (2 × 20 mL), followed by concentration *in vacuo*. The residue was purified by flash chromatography (PE:EA = 3:1) to afford the desired compound **S2** (1.47 g, 63% yield). <sup>1</sup>H NMR (400 MHz, CDCl<sub>3</sub>) δ 8.08 (d, *J* = 7.7 Hz, 2H), 7.02 (d, *J* = 7.7 Hz, 2H), 5.29 (s, 1H), 4.57 (q, *J* = 6.9 Hz, 2H), 1.49 (t, *J* = 7.1 Hz, 3H). <sup>13</sup>C NMR (75 MHz, MeOD) δ 160.78, 158.81, 158.24, 129.69, 122.65, 116.86, 63.16, 14.00. LC-MS (ESI): *m/z* [M+1]<sup>+</sup> calcd: 235.08; Found 235.04.

(**NP-1**). To a stirred solution of **S2** (1 g, 4.3 mmol) in 20 mL DMF was added propargyl bromide (0.56 g, 4.7 mmol) and K<sub>2</sub>CO<sub>3</sub> (1.16 g, 8.6 mmol). The mixture was stirred for 8 h at r.t., followed by addition of 2 mL water. The mixture was extracted with 2×10 mL ethyl acetate, and the organic phase was dried over anhydrous Na<sub>2</sub>SO<sub>4</sub> and concentrated. The residue was purified by column chromatography on silica gel (PE : EtOAc = 5:1) to give the pure product **NP-1** as a white solid (1.04 g, 89%). <sup>1</sup>H NMR (400 MHz, CDCl<sub>3</sub>) δ 8.14 (d, *J* = 7.8 Hz, 2H), 7.16 (d, *J* = 7.8 Hz, 2H), 4.79 (s, 2H), 4.57 (q, *J* = 7.0 Hz, 2H) 2.58 (m, 1H), 1.49 (t, *J* = 7.0 Hz, 3H). <sup>13</sup>C NMR (100 MHz, MeOD) δ 161.18, 159.21, 158.64, 130.09, 123.05, 117.26, 63.56, 14.40. LC-MS (ESI): *m/z* [M+1]<sup>+</sup> calcd: 273.09; Found 273.07.

(**L7**). To a solution of **NP-1** (0.54 g, 2 mmol) in 10 mL methanol was added 1.5 mL 4N NaOH. The mixture was stirred for 8 h at r.t. The mixture was acidified with aq 1 N HCl and extracted with EtOAc (3×10 mL). The combined organic layers were dried (anhydrous Na<sub>2</sub>SO<sub>4</sub>) and concentrated. The residue was purified by column chromatography on silica gel (PE : EA = 1:1) to give the pure product **L7** as a yellow solid (0.46 g, 95%). <sup>1</sup>H NMR (400 MHz, CDCl<sub>3</sub>) δ 8.18 (d, *J* = 8.0 Hz, 2H), 7.19 (d, *J* = 8.0 Hz, 2H), 4.82 (s, 2H), 2.60 (m, 1H). <sup>13</sup>C NMR (100 MHz, MeOD) δ 160.68, 160.36, 159.30, 131.69, 122.86, 117.08, 79.04, 77.49, 57.04. HR-MS (ESI): *m/z* [M+1]<sup>+</sup> calcd :245.0675; Found 245.0663.

(**BA-1**). To a solution of **L7** (20 mg, 0.08 mmol) in 10 mL DMF was added DCC (16 mg, 0.08 mmol) and DMAP (20 mg, 0.08 mmol), the mixture was stirred for 30 min at r.t followed by addition of betulinic acid (19 mg , 0.04 mmol). The reaction was stirred at room temperature for another 6h. Subsequently, the reaction was quenched by addition of 10 mL water and extracted with 2 × 10 mL of ethyl acetate. The organic layers were washed with 2×10 mL brine and dried over anhydrous Na<sub>2</sub>SO<sub>4</sub>. Upon solvent evaporation *in vacuo*, the residue was purified by flash column (PE : EA = 4:1) to give **BA-1** as a yellow solid (19 mg, 71%). <sup>1</sup>H NMR (400 MHz, CDCl<sub>3</sub>) δ 8.08 (d, *J* = 8.0, 2H), 7.14 (d, *J* = 8.0, 2H) , 4.73 (s, 1H), 4.59 (s, 1H), 4.47 (m, 1H), 4.20 (m, 1H), 3.63 (m, 1H), 3.48 (m, 1H), 3.18 (m, 1H), 2.59 (m, 1H), 2.27 (m, 2H), 1.69 (s, 3H), 1.25-1.40 (m, 14H), 1.19-1.09 (m, 7H), 0.97 (s, 6H), 0.93 (s, 3H), 0.81 (s, 3H), 0.75 (s, 3H). <sup>13</sup>C NMR (100 MHz, DMSO) δ 177.35, 160.24, 158.72, 152.17, 150.42, 129.76, 121.89, 116.36, 109.76, 78.95, 78.75, 76.91, 55.53, 55.02, 50.05, 48.65, 46.74, 42.12, 38.62, 37.71, 36.84, 33.47, 31.83, 30.19, 29.33, 28.22, 27.27, 25.54, 25.46, 25.20, 24.59, 20.58, 19.06, 18.09, 16.07, 15.93, 15.85, 14.50. HR-MS (ESI): *m/z* [M+1]<sup>+</sup> calcd 683.4172; Found 683.4192.

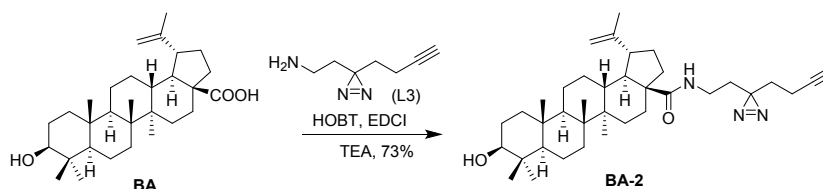

Scheme S2

(**BA-2**). The Synthesis of **L3** was based on previously published procedures.<sup>[1]</sup> To a stirred solution of **BA** (46 mg, 0.1 mmol) in 5 mL DMF were added HOBT (20 mg, 0.15 mmol), EDCI (29 mg, 0.15 mmol) and TEA (152 mg, 0.15 mmol). The mixture was stirred for 30 min at r.t followed by addition of **L3** (15 mg, 0.11 mmol). The reaction was then stirred at room temperature overnight in the dark. Subsequently, it was quenched by addition of

5 mL water and extracted with 2 × 10 mL of ethyl acetate. The organic layers were washed with 2×10 mL brine and dried over anhydrous Na<sub>2</sub>SO<sub>4</sub>. Upon solvent evaporation *in vacuo*, the residue was purified by flash column (PE : EA = 10:1) to give **BA-2** as a yellow solid (42mg, 73%). <sup>1</sup>H NMR (300 MHz, CDCl<sub>3</sub>) δ 5.65 (t, *J* = 5.1Hz, 1H), 4.74 (s, 1H), 4.59 (s, 1H), 3.14 (m, 3H), 2.44 (m, 1H), 2.34 (m, 1H), 2.00 (m, 4H), 1.8 (m, 1H), 1.60 (s, 3H), 1.25-1.64 (m, 28H), 0.97 (s, 6H), 0.93 (s, 3H), 0.81 (s, 3H), 0.75 (s, 3H), 0.66 (d, *J* = 8.7 Hz, 1H). <sup>13</sup>C NMR (75 MHz, DMSO) δ 175.58, 150.98, 150.41, 109.73, 109.31, 83.18, 76.90, 71.84, 55.51, 55.06, 54.89, 50.18, 49.71, 48.63, 46.71, 46.23, 42.10, 41.99, 38.60, 36.84, 33.77, 32.23, 31.30, 28.97, 28.20, 27.31, 25.32, 20.67, 19.12, 18.07, 16.07, 15.94, 15.90, 14.48, 14.41, 12.83. HR-MS (ESI): *m/z* [M+1]<sup>+</sup> calcd 576.4529; Found 576.4504.

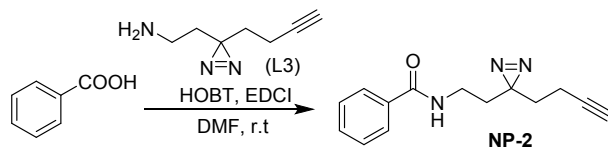

Scheme S3

(**NP-2**). To a stirred solution of benzoic acid (122 mg, 1 mmol) in 5 mL DMF was added **L3** (150.8 mg, 1.1 mmol), HOBT (202 mg, 1.5 mmol), EDCI (289 mg, 1.5 mmol) and TEA (101 mg, 1 mmol). The mixture was stirred for 10 h at room temperature in dark. Subsequently, the reaction was quenched by water (10 mL) and extracted by 3×10 mL ethyl acetate. The organic phases were combined together and dried over with anhydrous Na<sub>2</sub>SO<sub>4</sub>. Upon vacuum concentration, the residue was purified by flash column chromatography (PE : EA = 3:1) to yield **NP-2** (173 mg, 72%) as a white solid. <sup>1</sup>H NMR (300 MHz, CDCl<sub>3</sub>) δ 7.78 (m, 2H), 7.44 (m, 3H), 6.31 (s, 1H), 3.32 (m, 2H), 2.05 (m, 2H), 1.99 (t, *J* = 2.5 Hz, 1H), 1.83 (t, *J* = 6.7 Hz, 2H), 1.69 (t, *J* = 7.1Hz, 2H). <sup>13</sup>C NMR (75 MHz, DMSO) δ 166.68, 134.93, 131.62, 128.75, 127.57, 83.62, 72.27, 34.84, 32.38, 31.74, 27.77, 13.16. HR-MS (ESI): *m/z* [M+1]<sup>+</sup> calcd 242.1293; Found 242.1285.

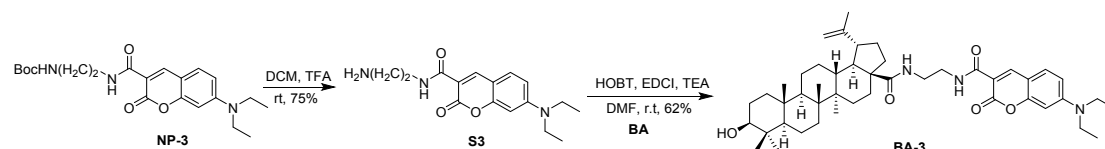

Scheme S4

The Synthesis of **NP-3** and **S3** was according to the previously published procedures<sup>[6]</sup> For **S3**, <sup>1</sup>H NMR (400 MHz, CD<sub>3</sub>OD) δ 8.66 (s, 1H), 7.57 (d, *J* = 9.2 Hz, 1H), 6.85 (d, *J* = 9.0 Hz, 1H), 6.60 (d, *J* = 9.0 Hz, 1H), 3.68 (t, *J* = 5.6 Hz, 2H), 3.56 (q, *J* = 6.5 Hz, 4H), 3.14 (t, *J* = 5.6 Hz, 2H), 1.26 (t, *J* = 7.0 Hz, 6H). LC-MS (ESI): *m/z* [M+1]<sup>+</sup> calcd: 303.16; Found :303.14.

(**BA-3**). To a stirred solution of BA (0.16 g, 0.36 mmol) in 10 mL DCM was added HOBT (39 mg, 0.54 mmol), EDCI (100 mg, 0.54 mmol) and TEA (101 mg, 1.0 mmol). The mixture was stirred for 30min at r.t followed by addition of **S3** (0.12g, 0.4 mmol). The reaction was stirred for another 24h followed by addition of 10 mL water. The mixture was extracted with 3×10 mL ethyl acetate. The organic phases were combined together and dried over with anhydrous Na<sub>2</sub>SO<sub>4</sub>. Upon vacuum concentration, the residue was purified by flash column chromatography (DCM : MeOH = 10:1) to yield **BA-3** (160 mg, 62%) as a yellow solid. <sup>1</sup>H NMR (400 MHz, CDCl<sub>3</sub>) δ 9.03 (s, 1H), 8.60 (s, 1H), 7.37 (d, *J* = 8.9 Hz, 1H), 6.59 (d, *J* = 8.9Hz, 1H), 6.44 (s, 2H), 4.65 (s, 1H), 4.49 (s, 1H), 3.74 (m, 1H), 3.56 (m, 1H), 3.38 (q, *J* = 6.4 Hz, 4H), 3.22 (d, *J* = 11.7 Hz, 1H), 3.08 (m, 2H), 2.18 (m, 3H), 1.94 (m, 5H), 1.67 (m, 4H), 1.59 (s, 3H), 1.46 (m, 4H), 1.36-1.22 (m, 14H), 0.81 (m, 4H), 0.78 (s, 6H), 0.69 (s, 3H), 0.64 (s, 3H), 0.60 (s, 3H), 0.47 (m, 1H). <sup>13</sup>C NMR (100 MHz, CDCl<sub>3</sub>) δ 176.66, 164.66, 162.62, 157.71, 152.74, 151.22, 148.22,

131.23, 129.88, 110.03, 109.72, 109.14, 108.40, 96.53, 55.67, 55.24, 50.46, 50.24, 46.85, 45.10, 42.35, 41.15, 40.49, 38.74, 38.61, 38.41, 38.29, 37.79, 37.09, 34.16, 33.43, 31.01, 29.70, 29.33, 27.94, 27.43, 27.22, 25.53, 22.70, 20.80, 19.52, 18.03, 16.02, 15.94, 15.39, 14.60, 14.13, 12.44. HR-MS (ESI):  $m/z$   $[M+1]^+$  calcd 742.5159; Found 742.5123.

#### 4. Cell Growth Inhibition Assay <sup>[7]</sup>

Cytotoxicity assays were carried out using MCF-7 cells by CCK8 assay. 5000 cells per well were seeded in a 96-well plate and incubated for 12 h in a humidified incubator for adherence. BA-1/2/3 and BA in DMSO were added to cells at the final concentrations of 0.1, 1, 2.5, 5, 10, 25, 50, and 100  $\mu$ M and further incubated for 72 h. CCK-8 reagent (10  $\mu$ L) was added to each well and incubated for 2 h. Following that, the absorbance was measured at 450 nm and 650 nm on a plate reader (Synergy HI, BioTek Instruments, Inc. Vermont, US). Cell viability rate was determined as  $VR = (A - A_0)/(A_s - A_0) \times 100\%$ , where A is the absorbance of the experimental group,  $A_s$  is the absorbance of the control group (DMSO was used as the control) and  $A_0$  is the absorbance of the blank group (no cells).  $IC_{50}$  values were calculated using GraphPad Prism.

#### 5. *In Situ* Proteome Labeling and Recombinant Protein Labeling with BA-1/2.

The procedures were based on previously published protocols with some modifications.<sup>[1,2,3]</sup> cells were grown to 80–90% confluency in 6-well plates under conditions as described above. The medium was removed, and cells were washed twice with cold PBS and then treated with 0.5 mL DMEM containing probe in the presence or absence of excess competitor (diluted from DMSO stocks whereby DMSO never exceeded 1% in the final solution). After 5 h of incubation at 37 °C/5% CO<sub>2</sub>, the medium was aspirated, and cells were washed gently with PBS (2 $\times$ ) to remove excessive probe, followed by UV irradiation for 30–40 min on ice (**BA-1-** and **BA-2-**treated samples were exposed to 302 nm and 365 nm UV lamp, respectively). The cells were trypsinized and pelleted by centrifugation. Eventually, the cell pellets were resuspended in HEPES buffer (200  $\mu$ L), homogenized by sonication, and diluted to 1 mg/mL with PBS. Four microliters of a freshly premixed click chemistry reaction cocktail in PBS (50  $\mu$ M TAMRA-N<sub>3</sub> from 2.5 mM stock solution in DMSO, 0.1 mM TBTA from 5 mM freshly prepared stock solution in DMSO, 1 mM TCEP from 50 mM freshly prepared stock solution in deionized water, and 1 mM CuSO<sub>4</sub> from 50 mM freshly prepared stock solution in deionized water) was added. The reaction was further incubated for 2 h with gentle mixing at room temperature, before being terminated by addition of pre-chilled acetone (0.5 mL; 30 min incubation at –20 °C). Precipitated proteins were subsequently collected by centrifugation (13000 rpm  $\times$  10 min at 4 °C). The supernatant was discarded and the pellet was washed with 200  $\mu$ L of prechilled methanol before redissolving in 2 $\times$  loading buffer and heated for 2 min at 90 °C. Around 10  $\mu$ g (per gel lane) of proteins were separated by SDS–PAGE (10% gel) and then visualized by in-gel fluorescence scanning (see Figure 3B).

For labeling of PGK1, to 2  $\mu$ g PGK1 in 19  $\mu$ L PBS buffer was added BA-2 in different concentrations or to 19  $\mu$ L PBS buffer containing BA-2 (5  $\mu$ M final concentration) was added different amount of PGK1. The resulting mixture was incubated for 20 min at 37°C prior to UV irradiation for 20 min, followed by conjugation with TAMRA-N<sub>3</sub> under click chemistry conditions for 2 hours. The samples were separated by SDS–PAGE (10% gel) and then visualized by in-gel fluorescence scanning (see Figure 4D).

#### 6. Cellular Imaging

To demonstrate the utility of the cell-permeable probes for imaging of potential cellular targets, we performed fluorescence microscopy. The general procedures were similar to what was previously reported.<sup>[1,2,3]</sup> For **BA-1** and **BA-2**, MCF-7 cells were seeded in glass bottom dishes (Mattek) and grown until 70–80% confluency. Cells were then treated with 0.5 mL DMEM with probes at different concentrations (10  $\mu$ M final concentration) in the presence or absence of BA (10 $\times$ ) as competitor. After incubation for 3 h at 37 °C, the medium was removed and

cells were gently washed twice with PBS, followed by UV irradiation (**BA-1** and **BA-2** treated samples were exposed to 302 nm and 365 nm UV lamp, respectively) for 20 min on ice. The cells were subsequently fixed for 1h at room temperature with 3.7% formaldehyde in PBS, washed twice with cold PBS again, and permeabilized with 0.1% Triton X-100 in PBS for 10 min. Cells were then treated with a freshly premixed click chemistry reaction solution in a 100  $\mu$ L volume (50  $\mu$ M TAMRA-N<sub>3</sub> from 2.5 mM stock solution in DMSO, 0.1 mM TBTA from 5 mM freshly prepared stock solution in DMSO, 1 mM TCEP from 50 mM freshly prepared stock solution in deionized water, and 1 mM CuSO<sub>4</sub> from 50 mM freshly prepared stock solution in deionized water) for 2 h at room temperature with vigorous shaking. Cells were washed with PBS three times and 0.1% Tween-20 in PBS for once. Finally, the cells were stained with Hoechst (1:5000 dilution in PBS) for 10 min at room temperature prior to image. NP-1 and NP-2 were used as controls concurrently. For co-localization experiments, cells were further incubated with anti-AIF antibody (1:100) for 1 h at room temperature (or overnight at 4 °C), washed twice with PBS, and then incubated with Goat Anti-Rabbit IgG H&L (Alexa Fluor® 488) (1:500) for 1 h, following by washing again. For live-cell imaging, cells were incubated with **BA-3** in 0.5 mL of DMEM for 3 h at 37 °C. The medium was replaced with 50  $\mu$ L PBS and then 50  $\mu$ L fresh medium and incubate for 30 min. NP-3 treated samples were used as controls. The cells were then stained with Mito tracker (10  $\mu$ M final concentration in DMEM) for 3 min at room temperature prior to image. Imaging was done with the Leica TCS SP8 confocal microscope system equipped with Leica HCX PL APO 40 $\times$ /1.20 W CORR CS, 405 nm diode laser, white laser (470–670 nm, with 1 nm increments, with eight channels AOTF for simultaneous control of eight laser lines, each excitation wavelength provides 1.5 mV), and a photomultiplier tube (PMT) detector ranging from 410 to 700 nm for steady state fluorescence. For **BA-1/2**,  $\lambda_{ex}$  = 550 nm,  $\lambda_{em}$  = 560 -590 nm. For **BA-3**,  $\lambda_{ex}$  = 405 nm and  $\lambda_{em}$  = 420-480 nm).

(A)

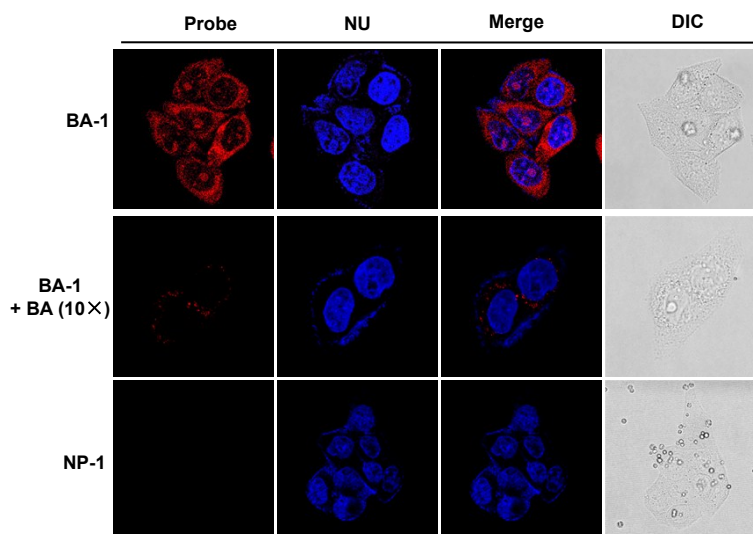

(B)

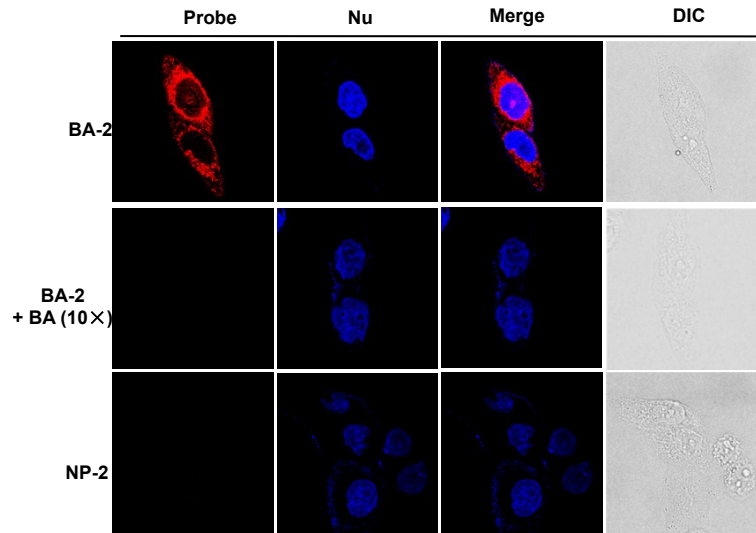

(C)

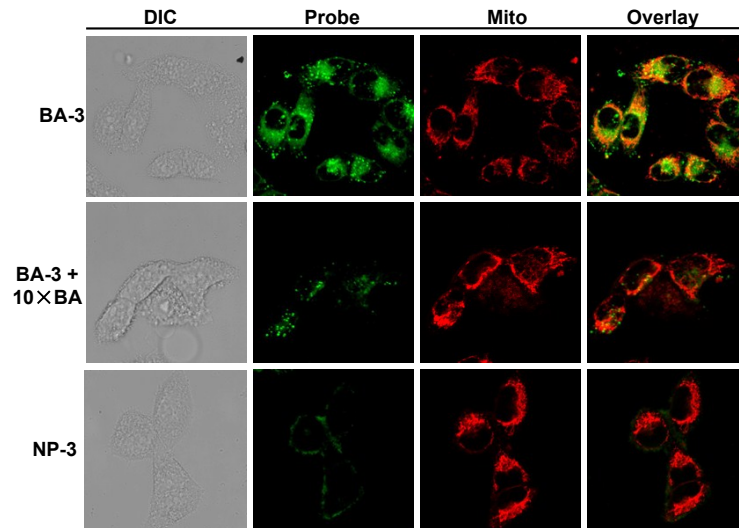

(D)

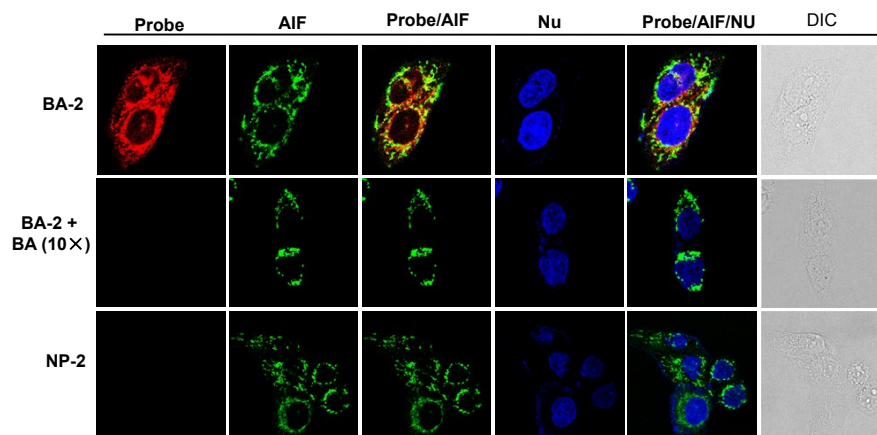

**Figure S1.** Cellular imaging of MCF-7 cells with different probes in the presence or absence of 10×BA; (A) **BA-1** and **NP-1** (10 μM final concentration). (B) **BA-2** and **NP-2** (10 μM). (C) **BA-3** and **NP-3** (5 μM). (D) Imaging of MCF-7 cells with **BA-3** (5 μM) and immunofluorescence (IF) against AIF (IF). Scale bar = 10 μm. Parts of the images were reproduced in the maintext (Figures 3C/3D and 4E).

## 7. Pull down/LC-MS/MS and Target Validation

To identify the potential cellular targets, pull-down (PD) experiments were carried out, and followed by Western blotting (WB) and LC-MS/MS, where applicable. The general pull-down procedure was based on our previously reported procedures,<sup>[1,2,3]</sup> with the following optimizations. **BA-1** and **BA-2** (10  $\mu\text{M}$ ) were directly added to live cells (DMSO should never exceed 1% in the final solution). After 5 h of incubation at 37 °C/5%  $\text{CO}_2$ , the medium was aspirated, and cells were washed twice gently with PBS to remove the excessive probe, followed by UV irradiation (**BA-1** and **BA-2** treated samples were exposed to 302 nm and 365 nm UV lamp, respectively) for 20 min on ice. The cells were then trypsinized and pelleted by centrifugation. Eventually, the cell pellets were resuspended in HEPES buffer (50  $\mu\text{L}$ ), homogenized by sonication, and diluted to 1 mg/mL. The labeled lysates were then subjected to click reaction with TAMRA-Biotin-Azide (50  $\mu\text{M}$  final concentration from 1 mM freshly prepared stock solution in DMSO). The mixture was incubated at room temperature for 2 h with gentle mixing, acetone precipitated, and resolubilized in 1% SDS (in PBS) with brief sonication. The resuspended sample was then incubated with avidin-agarose beads (100  $\mu\text{L}/\text{mg}$  protein) at r.t. for 2h. After centrifugation, supernatant were removed and the beads were washed with 1% SDS twice and 0.1% SDS twice. After washing, the beads were boiled in 1 $\times$  SDS loading buffer (200 mM Tris pH 6.8, 400 mM DTT, 8% SDS) for 15 min. Control PD using the negative probes (**NP-1/2**) were carried out concurrently with live cells. WB experiments were carried out as previously described using the corresponding antibodies.

PD samples were then separated on 10% SDS-PAGE gels, followed by coomassie staining. Trypsin digestion was performed with In-Gel Trypsin Digestion Kit from Pierce for the whole lane, as previously described.<sup>[1,2,3]</sup> Digested peptides were extracted from the gel with 50% acetonitrile and 1% formic acid. Peptides were separated and analyzed on an Easy-nLC 1000 system coupled to a Q Exactive HF (both - Thermo Scientific). About 1  $\mu\text{g}$  of peptides were separated in an home-made column (75  $\mu\text{m}$  x 15 cm) packed with C18 AQ (5  $\mu\text{m}$ , 300 $\text{\AA}$ , Michrom BioResources, Auburn, CA, USA) at a flow rate of 300 nL/min. Mobile phase A (0.1% formic acid in 2% ACN) and mobile phase B (0.1% formic acid in 98% ACN) were used to establish a 60 min gradient comprised of 2 min of 5% B, 40 min of 5-26% B, 5 min of 26-30% B, 1 min of 30-35% B, 2 min of 35-90% B and 10 min of 90% B. Peptides were then ionized by electrospray at 1.9 kV. A full MS spectrum (375-1400 m/z range) was acquired at a resolution of 120,000 at m/z 200 and a maximum ion accumulation time of 20 ms. Dynamic exclusion was set to 30 s. Resolution for HCD MS/MS spectra was set to 30,000 at m/z 200. The AGC setting of MS and MS<sup>2</sup> were set at 3E6 and 1E5, respectively. The 20 most intense ions above a 1.0E3 counts threshold were selected for fragmentation by HCD with a maximum ion accumulation time of 60 ms. Isolation width of 1.6 m/z units was used for MS<sup>2</sup>. Single and unassigned charged ions were excluded from MS/MS. For HCD, normalized collision energy was set to 25%.

The raw data were processed and searched with MaxQuant 1.5.4.1 with MS tolerance of 4.5 ppm, and MS/MS tolerance of 20 ppm. The UniProt human protein database (release 2016\_07, 70630 sequences) and database for proteomics contaminants from MaxQuant were used for database searches. Reversed database searches were used to evaluate false discovery rate (FDR) of peptide and protein identifications. Two missed cleavage sites of trypsin were allowed. Carbamidomethylation (C) was set as a fixed modification, and oxidation (M), Acetyl (Protein N-term) and deamidation (NQ) were set as variable modifications. The FDR of both peptide identification and protein identification is set to be 1%.<sup>[8]</sup> The options of “Second peptides”, “Match between runs” and “Dependent peptides” were enabled. Label-free quantification was used to quantify the difference of protein abundances between different samples.<sup>[9,10]</sup>



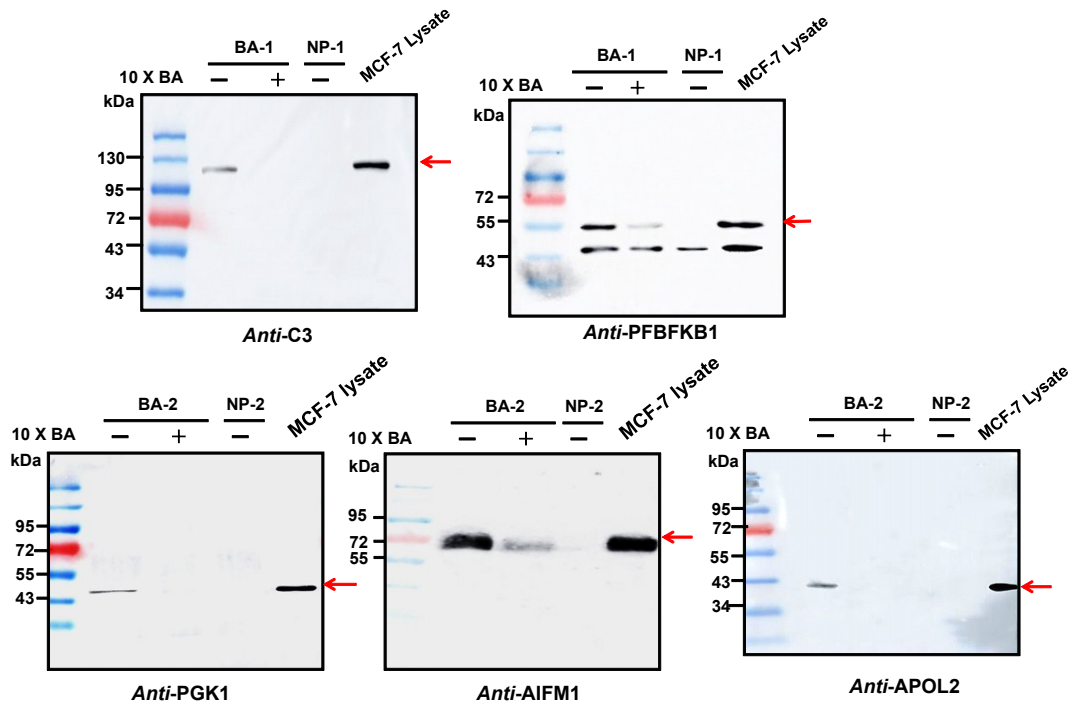

**Figure S2.** Validation of the protein hits with BA-1/2 (10  $\mu$ M) by Pull-down/WB.

**Table S1. Protein hits identified by LC-MS/MS with BA-1 and NP-1 in the presence or absence of BA.**

| Protein IDs         | Protein names                        | Gene names   | Unique peptides NP-1_1 | Unique peptides NP-1_2 | Unique peptides BA-1_1 | Unique peptides BA-1_2 | Unique peptides BA-1+BA_1 | Unique peptides BA-1+BA_2 | Intensity NP-1_1 | Intensity NP-1_2 | Intensity BA-1_1 | Intensity BA-1_2 | Intensity BA-1+BA_1 | Intensity BA-1+BA_2 | Score  |
|---------------------|--------------------------------------|--------------|------------------------|------------------------|------------------------|------------------------|---------------------------|---------------------------|------------------|------------------|------------------|------------------|---------------------|---------------------|--------|
| 3L2H8;I3L1L3;Q9BQG0 | Myb-binding protein 1A               | MYBBP1A      | 0                      | 0                      | 1                      | 1                      | 0                         | 0                         | 0                | 0                | 1151400          | 438510           | 0                   | 0                   | 7.5515 |
| O43290              | U4/U6.U5 tri-snRNP-associated pr     | SART1        | 0                      | 0                      | 2                      | 1                      | 0                         | 0                         | 0                | 0                | 1712900          | 798990           | 0                   | 0                   | 14.93  |
| P41091;Q2VIR3       | Eukaryotic translation initiation fa | EIF2S3;EIF2S | 0                      | 0                      | 1                      | 1                      | 0                         | 0                         | 0                | 0                | 1022900          | 0                | 0                   | 0                   | 11.151 |
| P69905              | Hemoglobin subunit alpha             | HBA1         | 0                      | 0                      | 1                      | 1                      | 0                         | 0                         | 0                | 0                | 140900000        | 1664700          | 0                   | 0                   | 72.418 |
| Q15149              | Plectin                              | PLEC         | 0                      | 0                      | 1                      | 1                      | 0                         | 0                         | 0                | 0                | 339210           | 195860           | 0                   | 0                   | 6.7093 |
| M0QXZ3;P01024       | Complement C3;Complement C3          | C3           | 0                      | 0                      | 1                      | 2                      | 0                         | 0                         | 0                | 0                | 2497100          | 0                | 0                   | 0                   | 12.961 |
| Q15424;Q14151       | Scaffold attachment factor B1;Scaf   | SAFB;SAFB2   | 0                      | 0                      | 1                      | 1                      | 0                         | 0                         | 0                | 0                | 2147000          | 397980           | 0                   | 0                   | 6.7944 |
| Q5T6W2;P61978       | Heterogeneous nuclear ribonucle      | HNRNPK       | 0                      | 0                      | 2                      | 1                      | 0                         | 0                         | 0                | 0                | 2053000          | 248070           | 0                   | 0                   | 16.952 |
| I1Z9G3              | 6-Phosphofructo-2-Kinase             | PFKFB1       | 0                      | 0                      | 1                      | 1                      | 0                         | 0                         | 0                | 0                | 0                | 0                | 0                   | 0                   | 6.1302 |
| A0A024R4M0;P46781;  | 40S ribosomal protein S9             | RPS9         | 2                      | 1                      | 3                      | 1                      | 1                         | 1                         | 11676000         | 4680000          | 32039000         | 9286100          | 4259000             | 6312400             | 39.157 |
| A0A087WUZ3;Q01082;  | Spectrin beta chain, non-erythro     | SPTBN1;SPT   | 2                      | 2                      | 1                      | 2                      | 0                         | 1                         | 14506000         | 10379000         | 60105000         | 4635500          | 0                   | 8889500             | 11.913 |
| A0A087WVQ9;Q5VTE0   | Putative elongation factor 1-alpha   | EEF1A1;EEF1  | 2                      | 5                      | 7                      | 4                      | 5                         | 4                         | 27795000         | 33647000         | 126270000        | 20873000         | 11035000            | 11218000            | 91.761 |
| A0A087WWY3;Q5HY54   | Filamin-A                            | FLNA         | 0                      | 3                      | 6                      | 3                      | 2                         | 2                         | 0                | 3425400          | 17148000         | 6309300          | 4887500             | 3808800             | 45.081 |
| A0A087WXZ5;A0A087   | Anthrax toxin receptor-like          | ANTXRL       | 1                      | 1                      | 1                      | 1                      | 1                         | 1                         | 4748500          | 62803000         | 171830000        | 18420000         | 1235100             | 6527300             | 7.0845 |
| A0A087WY00;G3V394;  | Unconventional myosin-Vc;Uncon       | MYO5A;MYO    | 1                      | 0                      | 1                      | 0                      | 0                         | 0                         | 2527700          | 0                | 3149000          | 0                | 0                   | 0                   | -2     |
| A0A087WYY6;Q13835   | Plakophilin-1                        | PKP1         | 1                      | 2                      | 4                      | 1                      | 1                         | 2                         | 4177100          | 9446300          | 15417000         | 3817700          | 2503500             | 4428600             | 94.661 |
| A0A087WZZ5;E9PPJ0;  | Splicing factor 3B subunit 2         | SF3B2        | 0                      | 0                      | 2                      | 0                      | 0                         | 0                         | 0                | 0                | 1915200          | 0                | 0                   | 0                   | 12.533 |
| A0A0A0MRQ5;A0A0A0   | Peroxiredoxin-1                      | PRDX1        | 1                      | 1                      | 1                      | 1                      | 0                         | 1                         | 4253100          | 5490300          | 22468000         | 2560200          | 0                   | 2939100             | 11.887 |
| A0A0A0MS07;A0A0A0   | Ig gamma-1 chain C region            | IGHG1        | 1                      | 1                      | 1                      | 0                      | 0                         | 0                         | 3060800          | 3010500          | 6956700          | 0                | 0                   | 0                   | 6.6705 |

|                      |                                    |             |   |   |   |   |   |   |          |          |           |          |          |          |        |
|----------------------|------------------------------------|-------------|---|---|---|---|---|---|----------|----------|-----------|----------|----------|----------|--------|
| A0A0A6YYC3;A0A0A6Y   | Putative RNA-binding protein Luc   | C7orf55-LUC | 0 | 0 | 1 | 0 | 0 | 0 | 0        | 0        | 0         | 0        | 0        | 0        | 8.9407 |
| A0A0B4J1R6;P29401;E  | Transketolase                      | TKT         | 3 | 4 | 7 | 5 | 2 | 4 | 4682000  | 8105500  | 41014000  | 17346000 | 4462500  | 15571000 | 40.873 |
| A0A0C4DH05;Q5JPF3    | Ankyrin repeat domain-containin    | ANKRD36C    | 1 | 1 | 1 | 1 | 0 | 0 | 2324900  | 2976400  | 10426000  | 1338600  | 0        | 0        | -2     |
| A0A0D9SEI8;A0A087X   | Nuclease-sensitive element-bindi   | YBX3;YBX1;Y | 0 | 0 | 1 | 1 | 1 | 0 | 0        | 0        | 5008400   | 583440   | 177230   | 0        | 11.748 |
| A0A0G2JIW1;P0DMV9;   | Heat shock 70 kDa protein 1B;Heat  | HSPA1B;HSP  | 2 | 2 | 4 | 2 | 0 | 2 | 2365000  | 2231500  | 13282000  | 2120300  | 0        | 2388500  | 29.376 |
| A1YLA2               |                                    | PLAGL1      | 1 | 1 | 1 | 1 | 0 | 0 | 3989000  | 3216400  | 3451000   | 3530700  | 0        | 0        | -2     |
| A2AB27;P36915        | Guanine nucleotide-binding prote   | GNL1        | 0 | 0 | 1 | 0 | 0 | 0 | 0        | 0        | 0         | 0        | 0        | 0        | 21.152 |
| A8K2U0               | Alpha-2-macroglobulin-like protei  | A2ML1       | 1 | 1 | 1 | 0 | 0 | 0 | 1507300  | 1533500  | 2246000   | 0        | 0        | 0        | 8.6539 |
| A8MYV2;Q9NQ29        | Putative RNA-binding protein Luc   | LUC7L       | 0 | 0 | 1 | 1 | 1 | 1 | 0        | 0        | 3039800   | 1633800  | 877160   | 748590   | 26.279 |
| B2R4S9;U3KQK0;Q998   | Histone H2B;Histone H2B type 1-L;  | HIST1H2BI;H | 0 | 1 | 2 | 2 | 0 | 2 | 0        | 0        | 3300500   | 846040   | 0        | 303400   | 26.685 |
| B5MCI8;Q9UHP6        | Radial spoke head 14 homolog       | RSPH14      | 1 | 1 | 1 | 0 | 0 | 0 | 3972100  | 2905200  | 19680000  | 0        | 0        | 0        | -2     |
| B5MDF5;P62826;A0A0   | GTP-binding nuclear protein Ran    | RAN         | 2 | 2 | 2 | 1 | 0 | 1 | 3546500  | 3611700  | 9316400   | 1111600  | 0        | 512750   | 15.015 |
| C9J060;C9JIU5;C9JWC5 | E3 ubiquitin-protein ligase TRIM22 | TRIM22      | 1 | 1 | 0 | 1 | 1 | 1 | 15252000 | 16765000 | 0         | 1321500  | 1529900  | 2797200  | -2     |
| C9J3N8;P04792        | Heat shock protein beta-1          | HSPB1       | 1 | 1 | 1 | 1 | 0 | 1 | 12891000 | 11170000 | 42913000  | 7707800  | 0        | 5199400  | 17.745 |
| C9J4Z3;P61513        | 60S ribosomal protein L37a         | RPL37A      | 0 | 0 | 1 | 1 | 1 | 1 | 0        | 0        | 3389400   | 1834300  | 738100   | 397470   | 13.956 |
| C9JA05;D6RHJ6;D6RD1  | Immunoglobulin J chain             | JCHAIN;IGJ  | 1 | 1 | 1 | 0 | 0 | 1 | 2027300  | 1607300  | 1142300   | 0        | 0        | 771240   | 6.7656 |
| C9JLK2;H7C393;H7C1U  | Acylamino-acid-releasing enzyme    | APEH        | 1 | 0 | 1 | 0 | 0 | 0 | 384870   | 0        | 1610000   | 0        | 0        | 0        | 8.2538 |
| C9JVW9;H7C5C9;E7EN   | Propionyl-CoA carboxylase beta c   | PCCB        | 0 | 1 | 2 | 2 | 2 | 2 | 0        | 393640   | 4053500   | 2655500  | 1738800  | 1191200  | 12.948 |
| C9JXB8;C9JNW5;P8373  | 60S ribosomal protein L24          | RPL24       | 1 | 1 | 1 | 1 | 0 | 0 | 3505400  | 4826700  | 7244100   | 398540   | 0        | 0        | 8.1324 |
| C9K0U8;A0A0G2JLD8;E  | Single-stranded DNA-binding prot   | SSBP1       | 1 | 1 | 1 | 0 | 0 | 0 | 747510   | 576320   | 2007900   | 0        | 0        | 0        | 10.739 |
| CON__A2A5Y0;CON__    | Keratin, type I cuticular Ha3-II   | KRT33B      | 0 | 0 | 1 | 0 | 0 | 0 | 8886600  | 8546000  | 82224000  | 29581000 | 604280   | 8614900  | 47.951 |
| CON__O95678;O95678   | Keratin, type II cytoskeletal 75   | KRT75       | 0 | 1 | 1 | 0 | 0 | 0 | 0        | 461520   | 2596200   | 0        | 0        | 0        | -2     |
| CON__P00761          |                                    |             | 3 | 4 | 3 | 4 | 4 | 4 | 6.72E+08 | 7.44E+08 | 830260000 | 1.93E+08 | 1.09E+08 | 2.14E+08 | 77.102 |

|                     |                                      |       |    |    |    |    |    |    |          |          |           |          |          |          |        |
|---------------------|--------------------------------------|-------|----|----|----|----|----|----|----------|----------|-----------|----------|----------|----------|--------|
| CON__P01966         |                                      |       | 1  | 1  | 1  | 1  | 1  | 1  | 2506000  | 2379300  | 11353000  | 3947600  | 4043600  | 16508000 | 13.81  |
| CON__P02533;P02533; | Keratin, type I cytoskeletal 14      | KRT14 | 3  | 3  | 2  | 1  | 2  | 1  | 4.37E+08 | 5.35E+08 | 561860000 | 73330000 | 20464000 | 75210000 | 280.42 |
| CON__P02538;P02538; | Keratin, type II cytoskeletal 6A     | KRT6A | 1  | 1  | 1  | 1  | 1  | 1  | 61426000 | 84501000 | 84207000  | 31707000 | 0        | 14242000 | 106.55 |
| CON__P02663         |                                      |       | 2  | 2  | 2  | 0  | 0  | 0  | 2829600  | 2309500  | 14537000  | 0        | 0        | 0        | 12.079 |
| CON__P02754         |                                      |       | 0  | 0  | 1  | 0  | 0  | 0  | 0        | 0        | 566110    | 0        | 0        | 0        | 6.8897 |
| CON__P02768-1;P0276 | Serum albumin                        | ALB   | 7  | 8  | 6  | 3  | 2  | 1  | 22752000 | 24308000 | 32413000  | 5499500  | 947800   | 2986400  | 62.59  |
| CON__P02769         |                                      |       | 39 | 44 | 47 | 34 | 25 | 28 | 4.26E+09 | 4.88E+09 | 1.273E+10 | 3.54E+09 | 1.07E+09 | 2.08E+09 | 323.31 |
| CON__P04259         |                                      |       | 1  | 1  | 1  | 1  | 0  | 1  | 1.38E+09 | 1.11E+09 | 1.342E+09 | 3.09E+08 | 2.97E+08 | 5.84E+08 | 323.31 |
| CON__P04264;CON__   |                                      |       | 2  | 2  | 0  | 2  | 2  | 2  | 48196000 | 26677000 | 0         | 29350000 | 1.02E+08 | 68501000 | 42.958 |
| CON__P05787;P05787; | Keratin, type II cytoskeletal 8      | KRT8  | 1  | 0  | 3  | 1  | 0  | 0  | 421680   | 0        | 8044400   | 1441800  | 0        | 0        | 21.914 |
| CON__P07744         |                                      |       | 0  | 0  | 0  | 0  | 0  | 0  | 0        | 405250   | 1122600   | 0        | 0        | 0        | 6.6806 |
| CON__P08727;P08727; | Keratin, type I cytoskeletal 19      | KRT19 | 1  | 1  | 1  | 0  | 0  | 1  | 1569100  | 1706300  | 5557700   | 0        | 0        | 229790   | -2     |
| CON__P08779;P08779; | Keratin, type I cytoskeletal 16      | KRT16 | 10 | 11 | 10 | 4  | 3  | 5  | 9.68E+08 | 1.31E+09 | 773430000 | 1.5E+08  | 86408000 | 2.3E+08  | 323.31 |
| CON__P12035;P12035; | Keratin, type II cytoskeletal 3      | KRT3  | 0  | 0  | 0  | 0  | 0  | 0  | 706750   | 1667200  | 5595900   | 18864000 | 0        | 4837700  | 46.166 |
| CON__P12763         |                                      |       | 0  | 0  | 1  | 1  | 1  | 0  | 0        | 0        | 1007300   | 694430   | 300000   | 0        | 7.2827 |
| CON__P13645;P13645; | Keratin, type I cytoskeletal 10      | KRT10 | 24 | 28 | 31 | 24 | 20 | 24 | 2.78E+09 | 3.28E+09 | 7.52E+09  | 1.57E+09 | 5.13E+08 | 1.01E+09 | 323.31 |
| CON__P13646-1       |                                      |       | 1  | 0  | 1  | 0  | 0  | 0  | 230320   | 0        | 884980    | 0        | 0        | 0        | -2     |
| CON__P13647;P13647; | Keratin, type II cytoskeletal 5      | KRT5  | 6  | 6  | 6  | 5  | 2  | 5  | 7.7E+08  | 7.84E+08 | 1.151E+09 | 2.61E+08 | 2.2E+08  | 3.68E+08 | 282.37 |
| CON__P20930;P20930  | Filaggrin                            | FLG   | 2  | 0  | 3  | 2  | 1  | 4  | 32588000 | 0        | 54376000  | 21552000 | 18812000 | 32987000 | 44.046 |
| CON__P34955         |                                      |       | 1  | 1  | 1  | 1  | 1  | 1  | 2202400  | 1695400  | 5222900   | 3472300  | 2930800  | 2378900  | 16.18  |
| CON__P35527;K7EQQ3  |                                      | KRT9  | 1  | 1  | 1  | 0  | 0  | 0  | 7033800  | 7999800  | 2687800   | 0        | 0        | 0        | 7.3519 |
| CON__P35908;P35908; | Keratin, type II cytoskeletal 2 epid | KRT2  | 26 | 25 | 28 | 16 | 17 | 18 | 2.39E+09 | 2.66E+09 | 4.278E+09 | 1.27E+09 | 6.63E+08 | 1.06E+09 | 323.31 |
| CON__Q04695;Q04695  | Keratin, type I cytoskeletal 17      | KRT17 | 2  | 2  | 3  | 1  | 1  | 1  | 74379000 | 82737000 | 88248000  | 24028000 | 27237000 | 39948000 | 100.37 |
| CON__Q3TTY5         |                                      |       | 1  | 1  | 1  | 1  | 1  | 1  | 13684000 | 19345000 | 16795000  | 10039000 | 9513200  | 13194000 | 23.68  |
| CON__Q5D862;Q5D86   | Filaggrin-2                          | FLG2  | 7  | 6  | 7  | 4  | 3  | 6  | 33196000 | 29606000 | 61478000  | 28220000 | 18649000 | 26756000 | 83.867 |

|                      |                                      |             |    |    |    |    |    |    |          |          |           |          |          |          |        |
|----------------------|--------------------------------------|-------------|----|----|----|----|----|----|----------|----------|-----------|----------|----------|----------|--------|
| CON__Q5XQN5;F8VU     |                                      |             | 0  | 0  | 0  | 0  | 0  | 0  | 1504500  | 1075200  | 4842200   | 2485800  | 0        | 1551900  | -2     |
| CON__Q61726;CON__    |                                      |             | 1  | 1  | 3  | 1  | 1  | 0  | 4658400  | 7592100  | 143570000 | 60769000 | 12895000 | 19098000 | 310.88 |
| CON__Q6KB66-1;Q6K    | Keratin, type II cytoskeletal 80     | KRT80       | 2  | 2  | 1  | 2  | 1  | 2  | 12490000 | 12816000 | 6163900   | 11670000 | 7398000  | 11077000 | 15.107 |
| CON__Q6NT21;CON__    | Keratin, type II cuticular Hb3;Putat | KRT83;KRT81 | 0  | 0  | 0  | 1  | 1  | 1  | 4241200  | 3802500  | 8823900   | 3577200  | 2983100  | 7983700  | 29.124 |
| CON__Q7Z794;Q7Z794   | Keratin, type II cytoskeletal 1b     | KRT77       | 4  | 4  | 4  | 0  | 0  | 2  | 21243000 | 27857000 | 52529000  | 2838900  | 817350   | 5316000  | 323.31 |
| CON__Q86YZ3;Q86YZ3   | Hornerin                             | HRNR        | 16 | 16 | 12 | 13 | 11 | 14 | 1.9E+08  | 2.09E+08 | 233670000 | 1.6E+08  | 1.54E+08 | 1.78E+08 | 323.31 |
| CON__Q8N1N4-2;CON    | Keratin, type II cytoskeletal 78     | KRT78       | 4  | 4  | 4  | 2  | 2  | 2  | 19988000 | 7652700  | 22457000  | 17113000 | 11437000 | 17389000 | 48.405 |
| CON__Q9C075;Q9C07    | Keratin, type I cytoskeletal 23      | KRT23       | 2  | 0  | 1  | 0  | 0  | 0  | 1528000  | 0        | 1487400   | 0        | 0        | 0        | 11.629 |
| CON__Q9R0H5;CON__    | Keratin, type II cytoskeletal 71     | KRT71       | 0  | 0  | 1  | 1  | 0  | 0  | 0        | 0        | 18135000  | 8946200  | 0        | 0        | -2     |
| CON__Q9TTE1;CON__    |                                      |             | 2  | 2  | 1  | 1  | 1  | 0  | 41526000 | 36280000 | 44870000  | 1482400  | 3979600  | 0        | 12.421 |
| CON__Q9UE12;CON__    | Keratin, type I cuticular Ha1;Kerati | KRT31;KRT33 | 0  | 0  | 1  | 0  | 0  | 0  | 0        | 0        | 8693500   | 0        | 0        | 0        | 25.163 |
| CON__Streptavidin    |                                      |             | 2  | 3  | 5  | 5  | 5  | 4  | 12063000 | 11510000 | 117630000 | 73614000 | 42919000 | 28018000 | 229.45 |
| D6R992;Q01201        | Transcription factor RelB            | RELB        | 1  | 1  | 1  | 1  | 1  | 1  | 0        | 3522000  | 56745000  | 21181000 | 12857000 | 8995400  | -2     |
| D6RAT0;P61247;D6R9B  | 40S ribosomal protein S3a            | RPS3A       | 2  | 2  | 3  | 2  | 2  | 2  | 3651300  | 5036900  | 36281000  | 9060800  | 4758700  | 3557400  | 43.203 |
| D6RD47;P62266        | 40S ribosomal protein S23            | RPS23       | 0  | 1  | 1  | 1  | 1  | 1  | 0        | 504010   | 8296400   | 3273000  | 1565000  | 887690   | 32.152 |
| D6RDY6;O76094        | Signal recognition particle subunit  | SRP72       | 0  | 0  | 1  | 0  | 0  | 0  | 0        | 0        | 0         | 0        | 0        | 0        | 6.7248 |
| D6RF44;H0YA96;D6RA   | Heterogeneous nuclear ribonucle      | HNRNPD      | 0  | 0  | 1  | 0  | 0  | 0  | 0        | 0        | 1168200   | 0        | 0        | 0        | 7.7677 |
| D6RFM2;D6R904;Q5V    |                                      | TPM3;DKFZp  | 1  | 1  | 1  | 1  | 0  | 0  | 3280000  | 2215700  | 5683000   | 325600   | 0        | 0        | 6.5591 |
| E5RJF9;P55040        | GTP-binding protein GEM              | GEM         | 0  | 1  | 0  | 0  | 0  | 0  | 0        | 0        | 0         | 0        | 0        | 0        | -2     |
| E7ENN3;A0A0C4DG40;   | Nesprin-1                            | SYNE1       | 1  | 1  | 1  | 0  | 0  | 0  | 2201400  | 2595400  | 4162000   | 0        | 0        | 0        | -2     |
| E7EQB2;E7ER44;P0278  | Lactotransferrin;Lactoferricin-H;K   | LTF         | 1  | 0  | 2  | 0  | 0  | 0  | 0        | 0        | 0         | 0        | 0        | 0        | 11.657 |
| E7ERL0;J3KPD9;Q32Q1  | Nucleoside diphosphate kinase;N      | NME1;NME2   | 1  | 1  | 2  | 0  | 0  | 0  | 844480   | 1152000  | 9841000   | 0        | 0        | 0        | 16.276 |
| E7ET15;O15042;U3KPT  | U2 snRNP-associated SURP motif-      | U2SURP      | 0  | 1  | 2  | 2  | 2  | 2  | 0        | 575390   | 6241900   | 2667800  | 1955700  | 1882500  | 14.832 |
| E7ETK0;A0A087WUS0;   | 40S ribosomal protein S24            | RPS24       | 0  | 1  | 2  | 2  | 0  | 1  | 0        | 0        | 3398800   | 2368400  | 0        | 1161800  | 11.663 |
| E7EX29;P63104;E7ESK7 | 14-3-3 protein zeta/delta            | YWHAZ       | 5  | 5  | 5  | 2  | 1  | 2  | 15973000 | 14007000 | 59865000  | 21071000 | 9400000  | 18119000 | 244.59 |

|                      |                                      |             |   |   |   |   |   |   |          |          |           |          |          |          |        |
|----------------------|--------------------------------------|-------------|---|---|---|---|---|---|----------|----------|-----------|----------|----------|----------|--------|
| E9PAL5;A8TX70        | Collagen alpha-5(VI) chain           | COL6A5      | 0 | 0 | 0 | 1 | 1 | 0 | 0        | 0        | 0         | 1.03E+08 | 38657000 | 0        | -2     |
| E9PBS1;P22234        | Multifunctional protein ADE2;Pho     | PAICS       | 1 | 1 | 1 | 0 | 0 | 0 | 3363600  | 3555800  | 14438000  | 0        | 0        | 0        | 23.115 |
| E9PG15;P27348        | 14-3-3 protein theta                 | YWHAQ       | 2 | 2 | 2 | 2 | 1 | 1 | 4000500  | 2888000  | 19663000  | 4729600  | 1602900  | 3150600  | 38.595 |
| E9PJD9;E9PLX7;P46776 | 60S ribosomal protein L27a           | RPL27A      | 3 | 3 | 3 | 2 | 1 | 2 | 7530800  | 10554000 | 15229000  | 1288200  | 195350   | 1029800  | 22.39  |
| E9PKE3;P11142;E9PQQ  | Heat shock cognate 71 kDa protein    | HSPA8       | 3 | 5 | 7 | 3 | 3 | 3 | 31736000 | 33491000 | 147660000 | 37488000 | 13807000 | 23343000 | 86.749 |
| E9PKP7;P17480;E9PM   | Nucleolar transcription factor 1     | UBTF        | 0 | 1 | 4 | 3 | 3 | 3 | 0        | 524390   | 5124100   | 3580400  | 2870000  | 2420400  | 33.411 |
| E9PKZ0;P62917;G3V1A  | 60S ribosomal protein L8             | RPL8        | 4 | 4 | 5 | 1 | 1 | 3 | 16715000 | 17398000 | 63291000  | 4662600  | 2073400  | 10317000 | 68.535 |
| E9PM57;A8MUE8;A8M    | PHD finger protein 20-like protein   | PHF20L1     | 0 | 0 | 1 | 0 | 0 | 0 | 0        | 0        | 0         | 0        | 0        | 0        | -2     |
| E9PR17;Q3C1V1        | Uncharacterized protein C11orf91     | CD59;C11orf | 1 | 0 | 1 | 0 | 0 | 0 | 1432100  | 0        | 4087500   | 0        | 0        | 0        | -2     |
| F5GWX5;A0A0C4DGG9    | Chromodomain-helicase-DNA-bin        | CHD4        | 0 | 0 | 3 | 2 | 1 | 0 | 0        | 0        | 6347200   | 771200   | 197540   | 0        | 31.664 |
| F5GYT8;E9PG35;E9PHF  | Methylcrotonoyl-CoA carboxylase      | MCCC1       | 0 | 0 | 3 | 2 | 2 | 1 | 0        | 0        | 2405300   | 893400   | 508680   | 156610   | 19.686 |
| F5H7A5;F5GX99;H0YG   | Caseinolytic peptidase B protein h   | CLPB        | 1 | 1 | 1 | 1 | 1 | 1 | 4144400  | 5531900  | 6069900   | 4956000  | 2732900  | 4721000  | -2     |
| F8VRU1;F8VYE9;F8VSC  | Eukaryotic translation initiation fa | EIF4B       | 0 | 0 | 1 | 1 | 1 | 0 | 0        | 0        | 4345300   | 684090   | 418520   | 0        | 7.7541 |
| F8VU69               |                                      | KRT5        | 1 | 1 | 1 | 0 | 0 | 0 | 1896200  | 1661000  | 5216300   | 0        | 0        | 0        | -2     |
| F8VUA6;H0YHA7;J3QQ   | 60S ribosomal protein L18            | RPL18       | 3 | 3 | 4 | 1 | 0 | 1 | 14690000 | 10939000 | 36047000  | 0        | 0        | 1243500  | 27.915 |
| F8VVM2;Q00325        | Phosphate carrier protein, mitoch    | SLC25A3     | 0 | 1 | 1 | 0 | 0 | 0 | 0        | 4653800  | 8705300   | 0        | 0        | 0        | 11.251 |
| F8VWV4;F8VVS8;F8VQ   | 60S acidic ribosomal protein P0-lik  | RPLP0;RPLP0 | 1 | 1 | 1 | 1 | 0 | 1 | 690670   | 1201200  | 4392500   | 844770   | 0        | 826690   | 29.361 |
| F8W6I7;P09651;H0YH8  | Heterogeneous nuclear ribonucle      | HNRNPA1     | 0 | 0 | 3 | 0 | 0 | 1 | 0        | 0        | 8257300   | 0        | 0        | 649660   | 30.441 |
| F8W6P5;P68871        | Hemoglobin subunit beta;LVV-he       | HBB         | 1 | 1 | 1 | 0 | 0 | 0 | 693000   | 852820   | 0         | 0        | 0        | 0        | 8.2081 |
| F8W727;P62910;D3YTB  | 60S ribosomal protein L32            | RPL32       | 1 | 2 | 0 | 0 | 0 | 0 | 1192500  | 1064100  | 0         | 0        | 0        | 0        | 11.521 |
| F8WD59;C9J9K3;A0A0   | 40S ribosomal protein SA             | RPSA        | 0 | 0 | 1 | 0 | 0 | 0 | 0        | 0        | 9879700   | 0        | 0        | 0        | 8.6591 |
| G3V3B0;S4R3H4;E7EQ   | Apoptotic chromatin condensatio      | ACIN1       | 0 | 0 | 1 | 1 | 1 | 0 | 0        | 0        | 12302000  | 1918900  | 731360   | 0        | 18.591 |
| G3V3U4;G3V3I1;G3V2   | Proteasome subunit alpha type;Pr     | PSMA6       | 1 | 1 | 1 | 0 | 0 | 0 | 958820   | 785240   | 2093600   | 0        | 0        | 0        | 6.5976 |
| G3V5X4;A0A0A0MRE3;   | Nesprin-2                            | SYNE2       | 1 | 2 | 1 | 1 | 0 | 0 | 18838000 | 6795300  | 7162800   | 7562100  | 0        | 0        | 11.457 |

|                      |                                       |             |   |   |    |   |   |   |          |          |           |          |          |          |        |
|----------------------|---------------------------------------|-------------|---|---|----|---|---|---|----------|----------|-----------|----------|----------|----------|--------|
| G3XAL0;P40926        | Malate dehydrogenase;Malate de        | MDH2        | 0 | 1 | 2  | 1 | 0 | 0 | 0        | 1388000  | 5168600   | 901270   | 0        | 0        | 17.578 |
| H0Y3S5;H0Y7Y5;E7ETR  | Protein MROH8                         | MROH8       | 0 | 0 | 1  | 0 | 0 | 0 | 0        | 0        | 0         | 0        | 0        | 0        | 6.9738 |
| H0Y4J3;Q5TH74        | O(6)-methylguanine-induced apo        | STPG1       | 1 | 0 | 1  | 1 | 1 | 0 | 1446500  | 0        | 120010000 | 63401000 | 39870000 | 0        | -2     |
| H0Y896;H0Y853        |                                       | CFAP44      | 1 | 1 | 1  | 0 | 0 | 0 | 5299700  | 9836900  | 2542300   | 0        | 0        | 0        | 6.735  |
| H0Y8B3               | Adenosylhomocysteinase                | AHCYL2      | 1 | 1 | 1  | 1 | 0 | 0 | 3066600  | 2700800  | 12842000  | 0        | 0        | 0        | -2     |
| H0Y9R4;D6RAN4;H0Y9   | 60S ribosomal protein L9              | RPL9        | 0 | 0 | 1  | 1 | 1 | 1 | 0        | 0        | 1166000   | 408670   | 403120   | 164970   | 6.7429 |
| H0YAE8;E7EUV9;F8W8   | Histone RNA hairpin-binding prot      | SLBP        | 0 | 0 | 1  | 0 | 1 | 0 | 0        | 0        | 829050    | 0        | 198610   | 0        | 6.6464 |
| H0YCN3;Q6ZMY9        | Zinc finger protein 517               | ZNF517      | 1 | 1 | 0  | 1 | 0 | 0 | 0        | 6723900  | 0         | 298640   | 0        | 0        | -2     |
| H0YMM1;H0YNP5;H0Y    | Annexin;Annexin A2;Putative ann       | ANXA2;ANX   | 3 | 3 | 3  | 2 | 1 | 2 | 12091000 | 11455000 | 32095000  | 5847000  | 856040   | 4873400  | 46.044 |
| H3BRU6;F8VZX2;Q153   | Poly(rC)-binding protein 2;Poly(rC    | PCBP2;PCBP  | 1 | 1 | 2  | 1 | 1 | 0 | 635940   | 931710   | 5216800   | 541790   | 383150   | 0        | 15.869 |
| H3BTN5;P14618;B4DN   | Pyruvate kinase;Pyruvate kinase P     | PKM         | 7 | 6 | 11 | 5 | 2 | 1 | 26618000 | 27738000 | 84094000  | 11049000 | 2420300  | 7841500  | 91.478 |
| H3BV80;H3BMM9;H3B    | RNA-binding protein with serine-r     | RNPS1       | 1 | 1 | 3  | 3 | 3 | 1 | 533150   | 417200   | 4640400   | 3120900  | 1915500  | 548260   | 25.94  |
| H7BZ09;H0YN26;P3968  | Acidic leucine-rich nuclear phosp     | ANP32A      | 0 | 0 | 0  | 1 | 1 | 1 | 0        | 0        | 0         | 3261000  | 1554700  | 636460   | 13.022 |
| H7BZ94;P07237;I3L0S0 | Protein disulfide-isomerase           | P4HB        | 2 | 2 | 5  | 2 | 0 | 1 | 2121000  | 1903300  | 11084000  | 0        | 0        | 704190   | 40.266 |
| H7C1V0;P07339        | Cathepsin D;Cathepsin D light chai    | CTSD        | 1 | 1 | 1  | 1 | 1 | 1 | 0        | 0        | 13093000  | 0        | 2863600  | 5719600  | 8.4193 |
| H7C4H2;Q9Y5M8        | Signal recognition particle recept    | SRPRB       | 0 | 0 | 1  | 0 | 0 | 0 | 0        | 0        | 0         | 0        | 0        | 0        | 6.5614 |
| I3L1Q5;Q2NL82        | Pre-rRNA-processing protein TSR1      | TSR1        | 0 | 0 | 1  | 0 | 0 | 0 | 0        | 0        | 1342800   | 0        | 0        | 0        | 9.6143 |
| I3L3H2;P38919        | Eukaryotic initiation factor 4A-III;E | EIF4A3      | 1 | 1 | 1  | 1 | 1 | 1 | 1189900  | 1022100  | 5068600   | 2222700  | 1131700  | 2054200  | 19.577 |
| J3KPS3;P04075;H3BQN  | Fructose-bisphosphate aldolase;F      | ALDOA       | 5 | 5 | 6  | 4 | 1 | 4 | 17154000 | 11256000 | 58065000  | 12094000 | 3307500  | 17583000 | 60.498 |
| J3KRB3;A0A087WWH0    | 60S ribosomal protein L17             | RPL17;RPL17 | 0 | 0 | 1  | 1 | 1 | 1 | 0        | 0        | 9930100   | 1716400  | 910030   | 530690   | 11.908 |
| J3KRG2;Q96QA5        | Gasdermin-A                           | GSDMA       | 1 | 1 | 1  | 1 | 1 | 1 | 2830500  | 6618200  | 5497800   | 1024700  | 504450   | 1788800  | 6.5496 |
| J3QR09;J3KTE4;P84098 | Ribosomal protein L19;60S riboso      | RPL19       | 5 | 5 | 5  | 4 | 2 | 3 | 32689000 | 29079000 | 90370000  | 32288000 | 4652300  | 13933000 | 63.08  |
| J3QR48;Q14974        | Importin subunit beta-1               | KPNB1       | 1 | 1 | 1  | 1 | 0 | 1 | 678320   | 431110   | 4664400   | 1071300  | 0        | 1161500  | 7.1879 |
| J3QSA3;F5GZ39;M0R1   | Ubiquitin-60S ribosomal protein L     | UBB;UBC;UB  | 1 | 1 | 1  | 1 | 0 | 1 | 3972900  | 6490500  | 16896000  | 1632400  | 0        | 1220800  | 8.0539 |
| K7EIE7;P53396        | ATP-citrate synthase                  | ACLY        | 1 | 1 | 2  | 2 | 2 | 2 | 6915800  | 6865500  | 13225000  | 6819200  | 2911800  | 5939800  | 15.823 |

|                          |                                             |            |   |   |    |   |   |   |          |          |           |          |          |          |        |
|--------------------------|---------------------------------------------|------------|---|---|----|---|---|---|----------|----------|-----------|----------|----------|----------|--------|
| K7EL50;P27797            | Calreticulin                                | CALR       | 0 | 0 | 1  | 0 | 0 | 0 | 0        | 0        | 962660    | 0        | 0        | 0        | 7.1819 |
| K7EM61;F5H0Q6;A0A0       |                                             | CLASRP     | 1 | 0 | 1  | 1 | 1 | 1 | 643510   | 0        | 3140300   | 2986200  | 1813900  | 1191200  | 8.3203 |
| K7EMA7;H7BY10;K7EJ       | 60S ribosomal protein L23a                  | RPL23A     | 1 | 1 | 3  | 2 | 2 | 1 | 525570   | 373950   | 10944000  | 2094300  | 1029900  | 53227    | 24.078 |
| K7EMN2;K7EM49;K7EP       | 6-phosphogluconate dehydrogen               | PGD        | 0 | 0 | 1  | 0 | 0 | 0 | 0        | 0        | 684260    | 0        | 0        | 0        | 6.5496 |
| K7EMS3                   |                                             | KRT19      | 1 | 1 | 1  | 1 | 0 | 0 | 11085000 | 12191000 | 21957000  | 960540   | 0        | 0        | 22.986 |
| K7ENG2;P26368            | Splicing factor U2AF 65 kDa subuni          | U2AF2      | 0 | 0 | 2  | 2 | 2 | 0 | 0        | 0        | 7214800   | 1362200  | 525090   | 0        | 11.79  |
| K7ENJ4;K7EK77;P2570      | ATP synthase subunit alpha, mitoc           | ATP5A1     | 2 | 2 | 2  | 1 | 0 | 1 | 9302200  | 10614000 | 13945000  | 2906500  | 0        | 1904400  | 11.981 |
| K7EP41;K7ERC6;K7EN       | Glucose-6-phosphate isomerase               | GPI        | 1 | 1 | 1  | 1 | 0 | 0 | 2241800  | 2284500  | 12176000  | 682930   | 0        | 0        | 14.553 |
| M0R0P7;M0R3D6;M0R        | 60S ribosomal protein L18a                  | RPL18A     | 1 | 1 | 0  | 0 | 0 | 0 | 1393500  | 2380400  | 0         | 0        | 0        | 0        | 9.4189 |
| M0R1E7;M0QXG5;M0R        | Serine/arginine repetitive matrix           | SRRM1      | 0 | 0 | 1  | 1 | 0 | 1 | 0        | 0        | 3469400   | 1958900  | 0        | 594670   | 24.012 |
| O00299                   | Chloride intracellular channel pro          | CLIC1      | 1 | 0 | 1  | 1 | 0 | 1 | 3067400  | 0        | 17480000  | 775840   | 0        | 2382500  | 6.7056 |
| O00635                   | E3 ubiquitin-protein ligase TRIM38          | TRIM38     | 0 | 0 | 1  | 0 | 0 | 0 | 0        | 0        | 3952000   | 0        | 0        | 0        | 7.6895 |
| O60701;D6RHF4;E9PB       | UDP-glucose 6-dehydrogenase                 | UGDH       | 3 | 2 | 3  | 1 | 0 | 1 | 2425700  | 3908000  | 13279000  | 1561800  | 0        | 1026900  | 20.009 |
| P00338;F5GXH2;F5GYU      | L-lactate dehydrogenase A chain             | LDHA       | 3 | 3 | 3  | 3 | 1 | 2 | 35158000 | 38685000 | 155780000 | 38533000 | 7643700  | 26995000 | 136.27 |
| P00966;Q5T6L6;Q5T6L      | Argininosuccinate synthase                  | ASS1       | 7 | 7 | 10 | 9 | 4 | 6 | 50637000 | 43316000 | 168330000 | 1.05E+08 | 30158000 | 62416000 | 80.045 |
| P01876;A0A0G2JMB2;P04040 | Ig alpha-1 chain C region;Ig alpha-Catalase | IGHA1;IGHA | 1 | 2 | 1  | 0 | 0 | 0 | 2037100  | 2201200  | 1949100   | 0        | 0        | 0        | 12.361 |
| P04083;Q5T3N1            | Annexin A1;Annexin                          | ANXA1      | 2 | 2 | 3  | 0 | 0 | 0 | 1838500  | 1888400  | 4342900   | 0        | 0        | 0        | 17.771 |
| P04264                   | Keratin, type II cytoskeletal 1             | KRT1       | 2 | 2 | 2  | 2 | 2 | 2 | 9.27E+09 | 9.58E+09 | 1.809E+10 | 5E+09    | 2.34E+09 | 4.96E+09 | 323.31 |
| P04406;E7EUT5            | Glyceraldehyde-3-phosphate deh              | GAPDH      | 7 | 7 | 9  | 7 | 4 | 7 | 91990000 | 45821000 | 257250000 | 77440000 | 31351000 | 90690000 | 82.905 |
| P05089                   | Arginase-1                                  | ARG1       | 2 | 2 | 1  | 0 | 0 | 1 | 3334000  | 3331800  | 3599900   | 0        | 0        | 1290800  | 13.275 |
| P05109                   | Protein S100-A8;Protein S100-A8,            | S100A8     | 1 | 1 | 0  | 0 | 0 | 0 | 3815400  | 6904500  | 0         | 0        | 0        | 0        | 6.5838 |
| P05186                   | Alkaline phosphatase, tissue-non            | ALPL       | 0 | 0 | 1  | 0 | 0 | 0 | 0        | 0        | 1937600   | 0        | 0        | 0        | 8.2876 |
| P05198                   | Eukaryotic translation initiation fa        | EIF2S1     | 1 | 1 | 1  | 1 | 1 | 1 | 3221100  | 2797600  | 7245300   | 2463900  | 397430   | 1821600  | 14.43  |



|                      |                                    |             |    |    |    |    |    |    |          |          |           |          |          |          |        |
|----------------------|------------------------------------|-------------|----|----|----|----|----|----|----------|----------|-----------|----------|----------|----------|--------|
| P06733;K7EM90;P1392  | Alpha-enolase                      | ENO1        | 8  | 8  | 13 | 7  | 4  | 3  | 41594000 | 40157000 | 204170000 | 53904000 | 1459700  | 10701000 | 113.15 |
| P06748               | Nucleophosmin                      | NPM1        | 1  | 0  | 1  | 1  | 0  | 0  | 1436800  | 0        | 5284600   | 2522600  | 0        | 0        | 7.0278 |
| P07195;A8MW50;F5H7   | L-lactate dehydrogenase B chain;L  | LDHB        | 3  | 3  | 4  | 2  | 0  | 0  | 37012000 | 41065000 | 172710000 | 23390000 | 2987200  | 14125000 | 135.32 |
| P07900;G3V2J8;Q1456  | Heat shock protein HSP 90-alpha    | HSP90AA1    | 0  | 0  | 2  | 1  | 0  | 0  | 0        | 0        | 8987900   | 2387400  | 0        | 0        | 35     |
| P08238;Q58FF7;Q58FF  | Heat shock protein HSP 90-beta     | HSP90AB1    | 2  | 3  | 5  | 4  | 3  | 2  | 11709000 | 14745000 | 84260000  | 20048000 | 6469900  | 11360000 | 97.132 |
| P08670;B0YJC4        | Vimentin                           | VIM         | 1  | 1  | 2  | 0  | 0  | 0  | 2527700  | 2706900  | 6415500   | 0        | 0        | 0        | 12.327 |
| P0DN76;Q01081        | Splicing factor U2AF 35 kDa subuni | U2AF1       | 0  | 0  | 1  | 1  | 1  | 1  | 0        | 0        | 3236900   | 1009100  | 547740   | 350730   | 7.2979 |
| P10412;P16402;Q0253  | Histone H1.4;Histone H1.3          | HIST1H1E;HI | 0  | 0  | 1  | 0  | 0  | 0  | 0        | 0        | 1414400   | 0        | 0        | 0        | 16.971 |
| P10809;E7EXB4;E7ESH  | 60 kDa heat shock protein, mitoch  | HSPD1       | 5  | 5  | 7  | 6  | 5  | 5  | 17400000 | 14547000 | 55603000  | 25902000 | 6907600  | 18663000 | 198.64 |
| P11021               | 78 kDa glucose-regulated protein   | HSPA5       | 2  | 1  | 5  | 3  | 2  | 3  | 5302000  | 1015000  | 22726000  | 8024500  | 3350100  | 6751900  | 37.652 |
| P11498;E9PRE7;E9PS68 | Pyruvate carboxylase, mitochondr   | PC          | 11 | 17 | 30 | 20 | 15 | 18 | 82086000 | 84729000 | 250330000 | 65073000 | 29238000 | 33122000 | 323.31 |
| P13639               | Elongation factor 2                | EEF2        | 3  | 3  | 5  | 2  | 1  | 2  | 5062600  | 6982800  | 25685000  | 5372400  | 1892600  | 3720600  | 48.974 |
| P13667               | Protein disulfide-isomerase A4     | PDIA4       | 1  | 1  | 3  | 1  | 0  | 0  | 563210   | 771710   | 10880000  | 983280   | 0        | 0        | 24.278 |
| P14625;Q96GW1        | Endoplasmin                        | HSP90B1     | 1  | 3  | 4  | 2  | 0  | 3  | 240610   | 2063700  | 17555000  | 4530200  | 0        | 2682800  | 31.034 |
| P14923;C9JTX4;C9J826 | Junction plakoglobin               | JUP         | 8  | 8  | 8  | 6  | 3  | 4  | 48992000 | 44938000 | 84331000  | 35541000 | 26159000 | 38533000 | 196.08 |
| P15924               | Desmoplakin                        | DSP         | 42 | 41 | 41 | 31 | 15 | 24 | 1.9E+08  | 1.87E+08 | 346330000 | 1.07E+08 | 44721000 | 1.03E+08 | 323.31 |
| P16403               | Histone H1.2                       | HIST1H1C    | 1  | 0  | 2  | 0  | 0  | 0  | 3608500  | 4815700  | 26107000  | 0        | 0        | 0        | 42.568 |
| P17066;P48741        | Heat shock 70 kDa protein 6;Putati | HSPA6;HSPA  | 1  | 1  | 1  | 1  | 1  | 1  | 2651500  | 2214500  | 7541200   | 2911900  | 636520   | 1687900  | 13.599 |
| P17174               | Aspartate aminotransferase, cyto   | GOT1        | 1  | 1  | 1  | 0  | 0  | 0  | 1188300  | 884960   | 2372700   | 0        | 0        | 0        | 7.8531 |
| P18124;A8MUD9;C9JZ   | 60S ribosomal protein L7           | RPL7        | 3  | 2  | 5  | 1  | 1  | 1  | 7888300  | 4204000  | 33866000  | 0        | 1443700  | 1125700  | 46.62  |
| P18206;Q5JQ13        | Vinculin                           | VCL         | 2  | 2  | 5  | 1  | 0  | 1  | 2514700  | 3308900  | 16473000  | 1103500  | 0        | 930300   | 42.108 |
| P19338;H7BY16        | Nucleolin                          | NCL         | 0  | 0  | 5  | 4  | 3  | 2  | 0        | 0        | 17376000  | 3480000  | 1540800  | 541540   | 35.089 |
| P22314;Q5JRS2;Q5JRR  | Ubiquitin-like modifier-activating | UBA1        | 1  | 0  | 2  | 0  | 0  | 0  | 0        | 0        | 2837900   | 0        | 0        | 0        | 19.511 |
| P22626               | Heterogeneous nuclear ribonucle    | HNRNPA2B1   | 1  | 0  | 1  | 0  | 0  | 0  | 1509400  | 0        | 3401600   | 0        | 0        | 0        | 15.491 |

|                      |                                     |            |    |    |    |    |    |    |          |          |           |          |          |          |        |
|----------------------|-------------------------------------|------------|----|----|----|----|----|----|----------|----------|-----------|----------|----------|----------|--------|
| P23526               | Adenosylhomocysteinase              | AHCY       | 0  | 0  | 1  | 0  | 0  | 0  | 0        | 0        | 2445700   | 0        | 0        | 0        | 6.6715 |
| P24752               | Acetyl-CoA acetyltransferase, mit   | ACAT1      | 1  | 1  | 1  | 0  | 0  | 0  | 1268500  | 0        | 2721500   | 0        | 0        | 0        | 13.513 |
| P25311               | Zinc-alpha-2-glycoprotein           | AZGP1      | 1  | 1  | 1  | 1  | 0  | 0  | 1933500  | 1835700  | 3086000   | 1323300  | 0        | 0        | 6.5828 |
| P26373;J3QSB4;J3KS98 | 60S ribosomal protein L13           | RPL13      | 5  | 6  | 5  | 4  | 0  | 2  | 19569000 | 14697000 | 57586000  | 11448000 | 0        | 3095100  | 75.521 |
| P26641               | Elongation factor 1-gamma           | EEF1G      | 1  | 2  | 3  | 0  | 0  | 0  | 443170   | 1366200  | 7886000   | 0        | 0        | 0        | 24.607 |
| P28482               | Mitogen-activated protein kinase    | MAPK1      | 0  | 0  | 1  | 0  | 0  | 0  | 0        | 0        | 1261200   | 0        | 0        | 0        | 8.5282 |
| P31944               | Caspase-14;Caspase-14 subunit p1    | CASP14     | 2  | 2  | 2  | 1  | 0  | 1  | 8126200  | 6104100  | 10131000  | 892550   | 0        | 1601800  | 13.357 |
| P31947               | 14-3-3 protein sigma                | SFN        | 2  | 1  | 3  | 2  | 1  | 1  | 2332200  | 7200900  | 36321000  | 11576000 | 4175300  | 8324400  | 25.433 |
| P35527               | Keratin, type I cytoskeletal 9      | KRT9       | 2  | 2  | 2  | 1  | 1  | 1  | 4.83E+09 | 4.68E+09 | 5.439E+09 | 2.21E+09 | 1.22E+09 | 2.78E+09 | 323.31 |
| P35998               | 26S protease regulatory subunit 7   | PSMC2      | 0  | 0  | 1  | 0  | 0  | 0  | 0        | 0        | 0         | 0        | 0        | 0        | 8.2844 |
| P36578;H3BM89;H3BT   | 60S ribosomal protein L4            | RPL4       | 7  | 8  | 9  | 4  | 3  | 3  | 26386000 | 22261000 | 78253000  | 29325000 | 8461300  | 2612500  | 104.36 |
| P38646;D6RA73;D6RJ12 | Stress-70 protein, mitochondrial    | HSPA9      | 1  | 2  | 4  | 1  | 1  | 1  | 22091000 | 14761000 | 49375000  | 17257000 | 17142000 | 11844000 | 30.799 |
| P39023;G5E9G0;B5MC   | 60S ribosomal protein L3            | RPL3       | 4  | 5  | 7  | 4  | 4  | 2  | 6063400  | 5145400  | 42961000  | 8624900  | 2578700  | 960810   | 75.755 |
| P40227               | T-complex protein 1 subunit zeta    | CCT6A      | 1  | 1  | 2  | 1  | 1  | 1  | 3935600  | 1993700  | 4733100   | 400270   | 240640   | 158070   | 12.36  |
| P47914               | 60S ribosomal protein L29           | RPL29      | 3  | 2  | 3  | 2  | 2  | 2  | 13717000 | 11391000 | 32198000  | 10432000 | 3272100  | 8004100  | 24.38  |
| P49711               | Transcriptional repressor CTCF      | CTCF       | 0  | 0  | 3  | 2  | 1  | 1  | 0        | 0        | 11849000  | 2866100  | 1071000  | 597670   | 54.631 |
| P50914;E7EPB3        | 60S ribosomal protein L14           | RPL14      | 5  | 3  | 5  | 4  | 3  | 4  | 6930900  | 14393000 | 37964000  | 15098000 | 15988000 | 24888000 | 45.618 |
| P50990;H7C4C8        | T-complex protein 1 subunit theta   | CCT8       | 1  | 2  | 2  | 0  | 0  | 0  | 901510   | 2399100  | 7075400   | 0        | 0        | 0        | 26.198 |
| P51665               | 26S proteasome non-ATPase regul     | PSMD7      | 0  | 0  | 1  | 0  | 0  | 0  | 0        | 0        | 809350    | 0        | 0        | 0        | 7.5686 |
| P55072               | Transitional endoplasmic reticulu   | VCP        | 0  | 1  | 2  | 0  | 0  | 0  | 0        | 381500   | 1919200   | 0        | 0        | 0        | 15.062 |
| P60174;U3KPZ0        | Triosephosphate isomerase           | TPI1       | 4  | 4  | 4  | 4  | 1  | 3  | 21365000 | 22155000 | 71524000  | 10553000 | 819520   | 8726000  | 61.368 |
| P60709;P63261;P63267 | Actin, cytoplasmic 1;Actin, cytopla | ACTB;ACTG1 | 13 | 16 | 19 | 14 | 11 | 13 | 2.01E+08 | 2.19E+08 | 794180000 | 3.51E+08 | 1.06E+08 | 1.94E+08 | 205.12 |
| P61313;E7EQV9;E7EX5  | 60S ribosomal protein L15;Riboso    | RPL15      | 6  | 9  | 10 | 4  | 4  | 6  | 1.8E+08  | 2.42E+08 | 597500000 | 1.36E+08 | 59654000 | 1.13E+08 | 158.04 |
| P61626;F8VV32;A0A0B  | Lysozyme C;Lysozyme                 | LYZ        | 2  | 2  | 2  | 2  | 1  | 2  | 7594700  | 12937000 | 15013000  | 8373900  | 14832000 | 19510000 | 14.234 |
| P61927;D6R9X9;D6RG1  | 60S ribosomal protein L37;Riboso    | RPL37      | 2  | 2  | 2  | 2  | 2  | 2  | 19113000 | 7956800  | 11092000  | 10650000 | 16114000 | 20069000 | 12.838 |

|                       |                                     |            |   |   |   |   |   |   |          |          |           |          |         |          |        |
|-----------------------|-------------------------------------|------------|---|---|---|---|---|---|----------|----------|-----------|----------|---------|----------|--------|
| P61981                | 14-3-3 protein gamma;14-3-3 prot    | YWHAG      | 2 | 1 | 2 | 1 | 0 | 0 | 1158600  | 877880   | 3069700   | 686210   | 0       | 0        | 15.283 |
| P62191                | 26S protease regulatory subunit 4   | PSMC1      | 0 | 1 | 1 | 0 | 0 | 0 | 0        | 598460   | 1269600   | 0        | 0       | 0        | 8.715  |
| P62258;B4DJF2;I3L3T1; | 14-3-3 protein epsilon              | YWHAE      | 2 | 2 | 2 | 1 | 0 | 1 | 5933100  | 5945800  | 17706000  | 1987000  | 0       | 654970   | 16.761 |
| P62424;Q5T8U3;Q5T8    | 60S ribosomal protein L7a           | RPL7A      | 7 | 8 | 9 | 3 | 2 | 2 | 23737000 | 44176000 | 125350000 | 37342000 | 9504100 | 17230000 | 71.204 |
| P62753;A2A3R5;A2A3    | 40S ribosomal protein S6            | RPS6       | 1 | 2 | 3 | 2 | 2 | 2 | 5488900  | 4956700  | 19550000  | 7619900  | 3498500 | 4354100  | 23.049 |
| P62805                | Histone H4                          | HIST1H4A   | 1 | 1 | 1 | 0 | 0 | 0 | 1172800  | 1108800  | 4056100   | 0        | 0       | 0        | 6.9499 |
| P62995;H7BXF3         | Transformer-2 protein homolog b     | TRA2B      | 0 | 1 | 2 | 2 | 2 | 2 | 0        | 587340   | 11903000  | 3310300  | 1850100 | 1076000  | 11.445 |
| P68363;F5H5D3;Q9BQ    | Tubulin alpha-1B chain;Tubulin al   | TUBA1B;TUB | 1 | 1 | 4 | 6 | 3 | 3 | 6148100  | 6461800  | 32467000  | 5970400  | 1812700 | 2639800  | 52.86  |
| P68371;Q3ZCM7;P043    | Tubulin beta-4B chain;Tubulin bet   | TUBB4B;TUB | 0 | 0 | 2 | 0 | 0 | 0 | 2358500  | 0        | 14798000  | 0        | 0       | 0        | 26.679 |
| P81605                | Dermcidin;Survival-promoting pe     | DCD        | 5 | 5 | 5 | 1 | 2 | 2 | 20617000 | 14450000 | 22470000  | 5111100  | 5063000 | 5668200  | 33.649 |
| Q01469                | Fatty acid-binding protein, epider  | FABP5      | 1 | 1 | 1 | 1 | 0 | 1 | 15052000 | 19063000 | 15114000  | 3417000  | 0       | 5158300  | 6.7158 |
| Q02413                | Desmoglein-1                        | DSG1       | 4 | 3 | 5 | 2 | 2 | 3 | 20491000 | 15291000 | 24643000  | 9357000  | 4833900 | 8039800  | 68.908 |
| Q02878;F8VZ45;U3KQ    | 60S ribosomal protein L6            | RPL6       | 4 | 4 | 5 | 2 | 0 | 1 | 18621000 | 21618000 | 39139000  | 2957800  | 0       | 1673200  | 44.36  |
| Q08188                | Protein-glutamine gamma-glutam      | TGM3       | 3 | 4 | 4 | 2 | 1 | 1 | 5830100  | 10888000 | 11309000  | 6357600  | 3576400 | 1570800  | 24.981 |
| Q08554                | Desmocollin-1                       | DSC1       | 4 | 4 | 4 | 1 | 0 | 1 | 16457000 | 20213000 | 28336000  | 1300600  | 0       | 1100800  | 36.608 |
| Q08945;E9PPZ7;E9PM    | FACT complex subunit SSRP1          | SSRP1      | 0 | 1 | 3 | 3 | 2 | 2 | 0        | 1177300  | 1746300   | 7189500  | 5533100 | 3507800  | 23.002 |
| Q12873;Q8TDI0;I3L229  | Chromodomain-helicase-DNA-bin       | CHD3;CHD5  | 0 | 0 | 2 | 0 | 0 | 0 | 0        | 0        | 1144200   | 0        | 0       | 0        | 12.034 |
| Q13200                | 26S proteasome non-ATPase regul     | PSMD2      | 0 | 0 | 1 | 0 | 0 | 0 | 0        | 0        | 3061900   | 0        | 0       | 0        | 10.558 |
| Q13243                | Serine/arginine-rich splicing facto | SRSF5      | 0 | 0 | 1 | 1 | 0 | 1 | 0        | 0        | 2955100   | 896170   | 0       | 225390   | 10.186 |
| Q14566                | DNA replication licensing factor M  | MCM6       | 1 | 0 | 1 | 0 | 0 | 0 | 296460   | 0        | 1043100   | 0        | 0       | 0        | 6.5611 |
| Q3BDU5;P02545         | Prelamin-A/C;Lamin-A/C              | LMNA       | 1 | 1 | 1 | 1 | 0 | 1 | 873390   | 1035800  | 6114200   | 2411500  | 0       | 1617800  | 7.948  |
| Q569K6                | Coiled-coil domain-containing pro   | CCDC157    | 1 | 1 | 1 | 1 | 1 | 1 | 17829000 | 18685000 | 12220000  | 2379700  | 789390  | 2242500  | -2     |
| Q5JP53;P07437;Q9BV    | Tubulin beta chain;Tubulin beta-2   | TUBB;TUBB2 | 0 | 1 | 1 | 0 | 0 | 0 | 0        | 402230   | 1312400   | 0        | 0       | 0        | -2     |
| Q5JR95;P62241         | 40S ribosomal protein S8            | RPS8       | 2 | 3 | 4 | 3 | 1 | 0 | 11073000 | 13313000 | 42485000  | 4158600  | 1217800 | 0        | 55.427 |
| Q5JVH2;P05165         | Propionyl-CoA carboxylase alpha     | PCCA       | 1 | 1 | 0 | 1 | 0 | 1 | 2776300  | 2785500  | 0         | 1386900  | 0       | 1400900  | 6.8052 |

|                     |                                      |              |   |   |   |   |   |   |          |          |          |          |          |          |        |
|---------------------|--------------------------------------|--------------|---|---|---|---|---|---|----------|----------|----------|----------|----------|----------|--------|
| Q5SZ64;Q15427       | Splicing factor 3B subunit 4         | SF3B4        | 0 | 0 | 1 | 1 | 1 | 0 | 0        | 0        | 6700800  | 986110   | 493400   | 0        | 6.6016 |
| Q5SZU1;O43175       | D-3-phosphoglycerate dehydroge       | PHGDH        | 1 | 1 | 2 | 0 | 0 | 0 | 1102900  | 2126800  | 11268000 | 0        | 0        | 0        | 37.574 |
| Q5T749              | Keratinocyte proline-rich protein    | KPRP         | 4 | 4 | 4 | 3 | 2 | 3 | 55885000 | 53951000 | 66526000 | 25034000 | 10171000 | 24879000 | 27.482 |
| Q5T7C4;P09429;B2RPK | High mobility group protein B1;Pu    | HMGB1;HM     | 1 | 1 | 2 | 2 | 2 | 1 | 697780   | 306620   | 13537000 | 6616400  | 2604900  | 1959200  | 15.54  |
| Q5VSY0              | G kinase-anchoring protein 1         | GKAP1        | 1 | 1 | 0 | 0 | 0 | 0 | 2121100  | 2326400  | 0        | 0        | 0        | 0        | -2     |
| Q6IS14;P63241       | Eukaryotic translation initiation fa | EIF5AL1;EIF5 | 0 | 0 | 0 | 1 | 0 | 0 | 0        | 0        | 0        | 909990   | 0        | 0        | 9.1747 |
| Q71DI3;K7EMV3;B4DE  | Histone H3.2;Histone H3;Histone      | HIST2H3A;H   | 1 | 1 | 2 | 1 | 1 | 0 | 11010000 | 13105000 | 18064000 | 1997800  | 348470   | 1888700  | 57.911 |
| Q7Z4V5;M0R0J3;K7EP  | Hepatoma-derived growth factor-      | HDGFRP2;H    | 0 | 0 | 2 | 2 | 2 | 2 | 0        | 0        | 4148400  | 1909600  | 1357300  | 984310   | 22.125 |
| Q8J015;M0QYS1;Q6NV  | Putative 60S ribosomal protein L1    | RPL13a;RPL1  | 1 | 1 | 1 | 1 | 0 | 0 | 1438600  | 1126400  | 3361100  | 533570   | 0        | 0        | 8.9014 |
| Q8NC51              | Plasminogen activator inhibitor 1    | SERBP1       | 0 | 0 | 0 | 0 | 1 | 0 | 0        | 0        | 0        | 0        | 0        | 0        | 10.967 |
| Q8TD47;P62701;C9JEH | 40S ribosomal protein S4, Y isoform  | RPS4Y2;RPS4  | 2 | 2 | 2 | 2 | 0 | 1 | 6806900  | 6723300  | 13005000 | 4774500  | 0        | 1352900  | 12.427 |
| Q8TEY5              | Cyclic AMP-responsive element-b      | CREB3L4      | 1 | 1 | 1 | 0 | 0 | 0 | 29108000 | 28152000 | 9596400  | 0        | 0        | 0        | -2     |
| Q8TF01              | Arginine/serine-rich protein PNIS    | PNISR        | 0 | 1 | 1 | 1 | 0 | 1 | 0        | 2255400  | 5636700  | 5508000  | 0        | 2126200  | 66.779 |
| Q8WTU0              | Protein DDI1 homolog 1               | DDI1         | 1 | 1 | 1 | 0 | 0 | 0 | 4248000  | 5218200  | 5639900  | 0        | 0        | 0        | -2     |
| Q8WVV4              | Protein POF1B                        | POF1B        | 1 | 1 | 1 | 0 | 0 | 0 | 2861200  | 2676500  | 3949100  | 0        | 0        | 0        | 7.9291 |
| Q92616              | Translational activator GCN1         | GCN1L1       | 0 | 0 | 1 | 0 | 0 | 0 | 0        | 0        | 1029800  | 0        | 0        | 0        | 15.51  |
| Q96JC9              | ELL-associated factor 1              | EAF1         | 0 | 0 | 1 | 1 | 1 | 1 | 0        | 0        | 1278000  | 1183200  | 909210   | 319680   | 11.991 |
| Q96L42              | Potassium voltage-gated channel      | KCNH8        | 1 | 1 | 1 | 0 | 0 | 1 | 10093000 | 10599000 | 15218000 | 0        | 0        | 1753900  | -2     |
| Q99832              | T-complex protein 1 subunit eta      | CCT7         | 0 | 0 | 1 | 2 | 1 | 1 | 0        | 0        | 2514600  | 1599500  | 656330   | 239890   | 32.128 |
| Q9BW60              | Elongation of very long chain fatty  | ELOVL1       | 0 | 1 | 1 | 1 | 0 | 1 | 0        | 2405200  | 5781600  | 2212100  | 0        | 2312700  | 6.7259 |
| Q9BXP5;H7C0U8       | Serrate RNA effector molecule ho     | SRRT         | 0 | 0 | 2 | 2 | 3 | 2 | 0        | 0        | 10023000 | 3472700  | 2816000  | 1036600  | 35.877 |
| Q9H3P7;Q5JT00;H0YA  | Golgi resident protein GCP60         | ACBD3        | 0 | 1 | 5 | 5 | 4 | 3 | 0        | 1166900  | 22326000 | 9867700  | 5293200  | 3469900  | 44.753 |
| Q9HBD4;A0A0A0MT49   | Transcription activator BRG1         | SMARCA4      | 0 | 0 | 1 | 0 | 0 | 0 | 0        | 0        | 883170   | 0        | 0        | 0        | 6.5881 |
| Q9NZT1              | Calmodulin-like protein 5            | CALML5       | 3 | 2 | 2 | 1 | 1 | 1 | 11237000 | 36451000 | 52450000 | 1050200  | 1158000  | 2040000  | 22.925 |
| Q9P0U3              | Sentrin-specific protease 1          | SENP1        | 1 | 1 | 1 | 1 | 0 | 1 | 8502100  | 0        | 2594000  | 844160   | 0        | 644900   | -2     |

|                     |                                     |        |   |   |   |   |   |   |         |         |          |         |         |         |        |
|---------------------|-------------------------------------|--------|---|---|---|---|---|---|---------|---------|----------|---------|---------|---------|--------|
| Q9P258              | Protein RCC2                        | RCC2   | 0 | 0 | 2 | 0 | 2 | 0 | 0       | 0       | 1670900  | 0       | 284660  | 0       | 12.807 |
| Q9UHB9              | Signal recognition particle subunit | SRP68  | 0 | 0 | 1 | 0 | 0 | 0 | 0       | 0       | 624790   | 0       | 0       | 0       | 8.4664 |
| Q9UPA5              | Protein bassoon                     | BSN    | 1 | 1 | 1 | 0 | 0 | 0 | 5073100 | 4992200 | 12304000 | 0       | 0       | 0       | -2     |
| Q9UQ80              | Proliferation-associated protein 2  | PA2G4  | 1 | 1 | 1 | 1 | 0 | 1 | 1022600 | 1085300 | 2888200  | 913170  | 0       | 369820  | 29.119 |
| Q9Y2A7              | Nck-associated protein 1            | NCKAP1 | 1 | 1 | 0 | 1 | 0 | 0 | 4289000 | 5481600 | 0        | 1523000 | 0       | 0       | -2     |
| Q9Y2T3              | Guanine deaminase                   | GDA    | 0 | 0 | 1 | 0 | 0 | 0 | 0       | 0       | 1718700  | 0       | 0       | 0       | 6.6873 |
| Q9Y2Z0              | Suppressor of G2 allele of SKP1 ho  | SUGT1  | 0 | 1 | 1 | 1 | 1 | 1 | 0       | 1367200 | 6093800  | 3419300 | 1231000 | 2253100 | 11.425 |
| Q9Y5S9              | RNA-binding protein 8A              | RBM8A  | 0 | 0 | 2 | 0 | 1 | 1 | 0       | 0       | 28886000 | 0       | 5935200 | 3059900 | 15.222 |
| U3KQT9;H0YI23;F8VU5 | YLP motif-containing protein 1      | YLPM1  | 0 | 0 | 1 | 0 | 0 | 0 | 0       | 0       | 869050   | 0       | 0       | 0       | 7.2368 |
|                     |                                     |        |   |   |   |   |   |   |         |         |          |         |         |         |        |

**Table S2. Protein hits identified by LC-MS/MS with BA-2 and NP-2 in the presence or absence of BA.**

| Protein IDs | Protein names                  | Gene names | Unique peptides NP-2_1 | Unique peptides NP-2_2 | Unique peptides BA-2_1 | Unique peptides BA-2_2 | Unique peptides BA-2+ BA_1 | Unique peptides BA-1+ BA_2 | Intensity NP-2_1 | Intensity NP-2_2 | Intensity BA-2_1 | Intensity BA-2_2 | Intensity BA-2+ BA_1 | Intensity BA-2+ BA_2 | Score  |
|-------------|--------------------------------|------------|------------------------|------------------------|------------------------|------------------------|----------------------------|----------------------------|------------------|------------------|------------------|------------------|----------------------|----------------------|--------|
| 1A0A0U1RQ   | Reticulon;Reticulon-4          | RTN4       | 0                      | 0                      | 2                      | 1                      | 0                          | 0                          | 0                | 0                | 11570000         | 2790800          | 0                    | 0                    | 6.1043 |
| 1B5MCW2;G   | 60S ribosomal protein L3       | RPL3       | 0                      | 0                      | 1                      | 1                      | 0                          | 0                          | 0                | 0                | 2561200          | 2520000          | 0                    | 0                    | 5.8111 |
| 1E7EWU0;H0  | NADPH--cytochrome P450 red     | POR        | 0                      | 0                      | 2                      | 1                      | 0                          | 0                          | 0                | 0                | 6905800          | 6140600          | 0                    | 0                    | 6.0048 |
| 1E9PMA0;O9  | Apoptosis-inducing factor 1, m | AIFM1      | 0                      | 0                      | 1                      | 1                      | 0                          | 0                          | 0                | 0                | 2108500          | 2001400          | 0                    | 0                    | 5.7787 |
| 1E9PMM3;Q   | Peroxisomal membrane protei    | PEX16      | 0                      | 0                      | 1                      | 2                      | 0                          | 0                          | 0                | 0                | 531820           | 1109000          | 0                    | 0                    | 11.576 |
| 1H0YB56;E5R | Protein LYRIC                  | MTDH       | 0                      | 0                      | 1                      | 1                      | 0                          | 0                          | 0                | 0                | 2473700          | 2497700          | 0                    | 0                    | 6.4224 |
| 1J3KQL8;Q9  | Apolipoprotein L2              | APOL2      | 0                      | 0                      | 3                      | 2                      | 0                          | 0                          | 0                | 0                | 12545000         | 5569400          | 0                    | 0                    | 13.994 |
| 1K7EMN5;Q   | Dynactin-associated protein    | DYNAP      | 0                      | 0                      | 1                      | 1                      | 0                          | 0                          | 0                | 0                | 8413000          | 1588000          | 0                    | 0                    | -2     |

|             |                                  |            |   |   |   |   |   |   |          |           |           |           |          |          |        |
|-------------|----------------------------------|------------|---|---|---|---|---|---|----------|-----------|-----------|-----------|----------|----------|--------|
| 1K7ER39;K7E | Perilipin-3                      | PLIN3      | 0 | 0 | 1 | 1 | 0 | 0 | 0        | 0         | 9237000   | 2609500   | 0        | 0        | 9.1721 |
| 1P00558;P07 | Phosphoglycerate kinase 1;Ph     | PGK1;PGK   | 0 | 0 | 2 | 1 | 0 | 0 | 0        | 0         | 7048700   | 485080    | 0        | 0        | 13.797 |
| 1P51857     | 3-oxo-5-beta-steroid 4-dehydr    | AKR1D1     | 0 | 0 | 1 | 1 | 0 | 0 | 0        | 0         | 4294400   | 3436300   | 0        | 0        | 5.8604 |
| 1Q8TDB6     | E3 ubiquitin-protein ligase DTX  | DTX3L      | 0 | 0 | 1 | 1 | 0 | 0 | 0        | 0         | 22045000  | 7703300   | 0        | 0        | 5.9463 |
| 1Q96AG4     | Leucine-rich repeat-containing   | LRRC59     | 0 | 0 | 2 | 1 | 0 | 0 | 0        | 0         | 1340400   | 1391500   | 0        | 0        | 6.0113 |
| 1Q96KC8     | DnaJ homolog subfamily C me      | DNAJC1     | 0 | 0 | 1 | 0 | 0 | 0 | 0        | 0         | 0         | 0         | 0        | 0        | 5.9734 |
| A0A075B6L0; | Ig lambda-3 chain C regions;Ig l | IGLC3;IGLC | 2 | 2 | 2 | 0 | 1 | 1 | 6763500  | 14853000  | 1698400   | 0         | 1784600  | 9792200  | 13.35  |
| A0A087WVQ   | Putative elongation factor 1-al  | EEF1A1;EE  | 2 | 2 | 3 | 3 | 2 | 3 | 31715000 | 35547000  | 67493000  | 34781000  | 29403000 | 39552000 | 19.506 |
| A0A087WYY   | Plakophilin-1                    | PKP1       | 1 | 2 | 2 | 1 | 1 | 1 | 2637000  | 9828400   | 7048200   | 1742800   | 749650   | 1923800  | 11.712 |
| A0A087X106  | Keratin, type II cuticular Hb6;K | KRT81;KRT  | 1 | 1 | 1 | 1 | 0 | 1 | 4866500  | 1185900   | 10648000  | 3417600   | 0        | 835660   | 6.2786 |
| A0A0A0MS01  |                                  | TRGV10     | 0 | 1 | 0 | 1 | 0 | 1 | 0        | 60532000  | 0         | 167580000 | 0        | 66518000 | -2     |
| A0A0A0MS0   | Ig gamma-1 chain C region;Ig g   | IGHG1;IGH  | 3 | 3 | 3 | 3 | 2 | 2 | 10070000 | 16248000  | 33132000  | 25826000  | 4576300  | 3903900  | 18.067 |
| A0A0A0MSJ   | Serine/threonine-protein pho     | PPP6R2     | 1 | 1 | 1 | 1 | 0 | 1 | 0        | 245380000 | 124750000 | 0         | 0        | 1.14E+08 | 6.3915 |
| A0A0B4J1R6; | Transketolase                    | TKT        | 0 | 1 | 1 | 1 | 0 | 1 | 0        | 5611300   | 8298300   | 1368300   | 0        | 1808100  | 5.9677 |
| A0A0G2JMB   | Ig alpha-2 chain C region;Ig alp | IGHA2;IGH  | 1 | 1 | 2 | 1 | 1 | 1 | 45469000 | 46461000  | 16755000  | 3511800   | 2821400  | 4451300  | 13.819 |
| A0A0J9YXM6  | WD repeat-containing protein     | WDR81      | 0 | 0 | 1 | 0 | 0 | 0 | 0        | 0         | 3039500   | 0         | 0        | 0        | 6.8273 |
| A6H900;F5G  | Axonemal dynein light chain d    | C1orf125;  | 1 | 1 | 1 | 0 | 1 | 1 | 31863000 | 11944000  | 4338200   | 0         | 4962600  | 9322600  | 5.937  |
| B0YJC5;B0YJ | Vimentin                         | VIM        | 1 | 0 | 0 | 0 | 1 | 1 | 2732900  | 0         | 0         | 0         | 3065700  | 4579900  | 6.5666 |
| B4DK69;A0A  | Aldo-keto reductase family 1     | AKR1C2;A   | 0 | 0 | 1 | 1 | 1 | 0 | 0        | 0         | 21393000  | 6118400   | 1560500  | 0        | -2     |
| B4DR61;P61  | Protein transport protein Sec6   | SEC61A1    | 1 | 0 | 3 | 3 | 2 | 1 | 360000   | 0         | 9547100   | 4957300   | 4168900  | 562660   | 17.484 |
| B7Z4L4;P048 | Dolichyl-diphosphooligosacch     | RPN1       | 0 | 0 | 3 | 3 | 2 | 3 | 0        | 0         | 19133000  | 9500000   | 2902100  | 3791300  | 18.836 |
| B7Z5J4;Q9UI | Carboxypeptidase A4              | CPA4       | 1 | 1 | 0 | 0 | 0 | 0 | 0        | 0         | 0         | 0         | 0        | 0        | 11.961 |
| B8ZZZ9;F8W  | Testis-specific gene 10 protein  | TSGA10     | 0 | 1 | 0 | 0 | 0 | 0 | 0        | 358410000 | 0         | 0         | 0        | 0        | 6.1245 |
| C9J0E4;P010 | Cystatin-A;Cystatin-A, N-termi   | CSTA       | 0 | 0 | 0 | 0 | 0 | 1 | 0        | 0         | 0         | 0         | 0        | 0        | 5.9064 |
| C9J2B5;P093 | Villin-1                         | VIL1       | 1 | 0 | 1 | 1 | 1 | 1 | 4581200  | 0         | 1715100   | 1862600   | 2522700  | 869480   | 6.2888 |

|              |                                   |           |    |    |    |    |    |    |           |            |           |           |          |          |        |
|--------------|-----------------------------------|-----------|----|----|----|----|----|----|-----------|------------|-----------|-----------|----------|----------|--------|
| C9JA05;D6R   | Immunoglobulin J chain            | JCHAIN;IG | 1  | 0  | 0  | 1  | 1  | 0  | 2418100   | 0          | 0         | 2015500   | 2296600  | 0        | 5.8393 |
| C9JI87;P2179 | Voltage-dependent anion-sele      | VDAC1     | 0  | 0  | 1  | 1  | 0  | 1  | 0         | 0          | 258340000 | 60230000  | 0        | 59902000 | 5.9515 |
| CON__O760    | Keratin, type I cuticular Ha6     | KRT36     | 0  | 0  | 7  | 7  | 1  | 1  | 0         | 0          | 85136000  | 38865000  | 4563600  | 5679700  | 51.546 |
| CON__P02754  |                                   |           | 3  | 3  | 3  | 3  | 3  | 2  | 96406000  | 94602000   | 32539000  | 15330000  | 23237000 | 13028000 | 18.172 |
| CON__P0276   | Serum albumin                     | ALB       | 7  | 5  | 5  | 7  | 5  | 6  | 111340000 | 61443000   | 17625000  | 18718000  | 20713000 | 40962000 | 64.39  |
| CON__P02769  |                                   |           | 27 | 27 | 29 | 28 | 25 | 29 | 2.13E+10  | 1.4969E+10 | 1.425E+10 | 7.898E+09 | 1.93E+10 | 2.71E+10 | 323.31 |
| CON__P0877   | Keratin, type I cytoskeletal 16   | KRT16     | 8  | 6  | 10 | 10 | 8  | 8  | 199630000 | 72907000   | 646110000 | 200420000 | 91964000 | 1.38E+08 | 78.73  |
| CON__P1364   | Keratin, type I cytoskeletal 10   | KRT10     | 12 | 12 | 13 | 13 | 10 | 13 | 2.101E+10 | 1.6888E+10 | 1.599E+10 | 1.189E+10 | 1.38E+10 | 9.63E+09 | 214.23 |
| CON__P1364   | Keratin, type II cytoskeletal 5   | KRT5      | 4  | 5  | 5  | 4  | 4  | 4  | 1.012E+09 | 1495300000 | 1.39E+09  | 581710000 | 3.59E+08 | 7.09E+08 | 164.67 |
| CON__P2093   | Filaggrin                         | FLG       | 2  | 3  | 2  | 1  | 2  | 0  | 3744400   | 8310400    | 4495600   | 2946500   | 4132000  | 0        | 17.563 |
| CON__P3552   | Keratin, type I cytoskeletal 9    | KRT9      | 14 | 14 | 13 | 12 | 12 | 13 | 6.098E+09 | 6040700000 | 4.619E+09 | 2.925E+09 | 3.19E+09 | 4.27E+09 | 213.43 |
| CON__P3590   | Keratin, type II cytoskeletal 2 e | KRT2      | 16 | 15 | 18 | 17 | 16 | 17 | 1.136E+10 | 1.3385E+10 | 9.593E+09 | 6.815E+09 | 5.35E+09 | 6.65E+09 | 323.31 |
| CON__Q6KB    | Keratin, type II cytoskeletal 80  | KRT80     | 5  | 5  | 5  | 5  | 3  | 4  | 63721000  | 24304000   | 36531000  | 26594000  | 14240000 | 19477000 | 33.148 |
| CON__Q7Z7    | Keratin, type II cytoskeletal 1b  | KRT77     | 4  | 4  | 4  | 4  | 3  | 4  | 23373000  | 35992000   | 55424000  | 24883000  | 10365000 | 22885000 | 37.635 |
| CON__Q86Y    | Hornerin                          | HRNR      | 6  | 10 | 9  | 9  | 3  | 10 | 335200000 | 257570000  | 283410000 | 78551000  | 43292000 | 2.8E+08  | 176.48 |
| CON__Q9NS    | Keratin, type II cuticular Hb4    | KRT84     | 0  | 2  | 10 | 11 | 0  | 1  | 0         | 9067800    | 130370000 | 118050000 | 6601200  | 4928400  | 91.524 |
| D6RCP8;O43   | Lipoyl synthase, mitochondrial    | LIAS      | 1  | 1  | 1  | 1  | 1  | 0  | 998330    | 12922000   | 6673400   | 3791200   | 4280500  | 0        | 6.3818 |
| D6RFM5;P31   | Succinate dehydrogenase [ubi      | SDHA      | 0  | 1  | 1  | 1  | 1  | 1  | 0         | 268230     | 1884200   | 554800    | 1752000  | 1741700  | 8.9033 |
| D6RHF4;E9P   | UDP-glucose 6-dehydrogenase       | UGDH      | 1  | 1  | 1  | 0  | 1  | 1  | 3040500   | 1411600    | 2838200   | 0         | 2960400  | 2136700  | 6.1298 |
| E7ENZ3;B7Z   | T-complex protein 1 subunit e     | CCT5      | 0  | 1  | 1  | 1  | 1  | 1  | 0         | 1185700    | 807810    | 637920    | 2613500  | 2673200  | 5.9649 |
| E7EX53;E7EQ  | Ribosomal protein L15;60S ribo    | RPL15     | 0  | 0  | 1  | 1  | 1  | 0  | 0         | 0          | 2489200   | 1683500   | 2065900  | 0        | 6.6006 |
| E9PKE3;P111  | Heat shock cognate 71 kDa prot    | HSPA8;HS  | 4  | 4  | 5  | 5  | 4  | 4  | 60794000  | 58470000   | 81253000  | 32477000  | 55946000 | 63535000 | 56.579 |
| F5H5D3;Q9B   | Tubulin alpha-1C chain;Tubulin    | TUBA1C;T  | 3  | 4  | 4  | 2  | 4  | 3  | 47646000  | 24822000   | 54800000  | 8605000   | 34237000 | 34301000 | 48.794 |
| F5H6R4;P170  | Zinc finger protein 26            | ZNF26     | 1  | 1  | 1  | 1  | 0  | 1  | 11977000  | 20107000   | 16369000  | 8623300   | 0        | 5262900  | 6.7395 |
| F8VWV4;F8    | 60S acidic ribosomal protein P0   | RPLP0;RPL | 1  | 0  | 1  | 1  | 1  | 1  | 1402000   | 0          | 5799800   | 1062700   | 1656600  | 1713800  | 7.5233 |

|               |                                  |           |   |   |   |   |   |   |          |          |          |          |          |          |        |
|---------------|----------------------------------|-----------|---|---|---|---|---|---|----------|----------|----------|----------|----------|----------|--------|
| F8VXU8;F8V    | Transmembrane and TPR repe       | TMTC1     | 0 | 0 | 1 | 0 | 0 | 0 | 0        | 0        | 0        | 0        | 0        | 0        | 6.1182 |
| F8WAM2;Q9     | T-complex protein 1 subunit et   | CCT7      | 1 | 0 | 1 | 1 | 1 | 1 | 1889700  | 0        | 1982900  | 558930   | 1744700  | 2616800  | 6.2373 |
| F8WCU7;F8WB54 |                                  | IL17RE    | 0 | 0 | 1 | 0 | 1 | 0 | 0        | 0        | 2405200  | 0        | 6478200  | 0        | 5.9225 |
| F8WE98;A0A    | Filamin-A                        | FLNA      | 0 | 0 | 0 | 0 | 1 | 1 | 0        | 0        | 0        | 0        | 4419900  | 2707400  | 7.3214 |
| G5E9X5;F5G    | Methylcrotonoyl-CoA carboxyl     | MCCC1     | 0 | 0 | 1 | 1 | 1 | 1 | 0        | 0        | 6152400  | 4303200  | 13712000 | 7529300  | 6.3038 |
| H0Y3Z3;H7B    | Protein disulfide-isomerase      | P4HB      | 2 | 2 | 3 | 3 | 2 | 3 | 2704400  | 4112700  | 24388000 | 11697000 | 5712800  | 6743100  | 18.545 |
| H0YGI8;P319   | Stress-induced-phosphoprotei     | STIP1     | 0 | 0 | 1 | 0 | 0 | 0 | 0        | 0        | 0        | 0        | 0        | 0        | 5.7915 |
| H0YJS4;G3V4   | Eukaryotic translation initiatio | EIF2S1    | 1 | 1 | 0 | 0 | 1 | 1 | 2541900  | 0        | 0        | 0        | 8468200  | 4209500  | 6.0213 |
| H0YLE8;A0A    | Ras GTPase-activating-like prot  | IQGAP1;IQ | 1 | 0 | 1 | 1 | 2 | 2 | 159920   | 0        | 0        | 2303900  | 5893800  | 6510500  | 11.507 |
| H0YMD0;H0Y    | Annexin;Annexin A2;Putative      | ANXA2;A   | 4 | 4 | 4 | 3 | 3 | 3 | 29397000 | 50741000 | 63995000 | 45764000 | 40065000 | 25756000 | 27.494 |
| H3BTN5;P14    | Pyruvate kinase;Pyruvate kina    | PKM;PKLR  | 2 | 2 | 2 | 2 | 1 | 2 | 14835000 | 6216200  | 14180000 | 8310900  | 5252000  | 6579100  | 14.17  |
| H7C144;F5G    | Alpha-actinin-4                  | ACTN4     | 0 | 0 | 0 | 0 | 0 | 1 | 0        | 0        | 0        | 0        | 0        | 0        | 5.8887 |
| H7C1V0;P07    | Cathepsin D;Cathepsin D light    | CTSD      | 1 | 1 | 1 | 0 | 1 | 1 | 6227500  | 11347000 | 11414000 | 0        | 2295700  | 6374900  | 5.8227 |
| H7C4C8;P50    | T-complex protein 1 subunit th   | CCT8      | 0 | 0 | 1 | 1 | 0 | 1 | 0        | 0        | 3478300  | 1903600  | 0        | 3217700  | 6.2499 |
| H7C597;Q7K    | Staphylococcal nuclease domai    | SND1      | 1 | 1 | 1 | 0 | 1 | 1 | 18433000 | 1118100  | 3207400  | 0        | 3263100  | 6011700  | 7.6038 |
| I3L192;A0A0   | Basigin                          | BSG       | 0 | 0 | 2 | 2 | 2 | 2 | 0        | 0        | 68002000 | 54820000 | 7751900  | 5526300  | 15.919 |
| I3L2V2        |                                  | DGKE      | 0 | 1 | 1 | 0 | 0 | 1 | 0        | 4093700  | 808600   | 0        | 0        | 4256000  | -2     |
| I6L8B7;Q014   | Fatty acid-binding protein, epi  | FABP5     | 0 | 0 | 1 | 1 | 1 | 1 | 0        | 0        | 2529700  | 874580   | 1414300  | 2662500  | 6.375  |
| J3KPS3;P040   | Fructose-bisphosphate aldolas    | ALDOA     | 3 | 3 | 3 | 4 | 5 | 6 | 7636000  | 9257000  | 8924500  | 10842000 | 19135000 | 36705000 | 38.984 |
| J3KTM9;Q14    | Importin subunit beta-1          | KPNB1     | 0 | 0 | 1 | 1 | 1 | 0 | 0        | 0        | 7189000  | 1608700  | 839430   | 0        | 14.997 |
| J3QRD1;P51    | Fatty aldehyde dehydrogenase     | ALDH3A2   | 0 | 0 | 2 | 1 | 0 | 1 | 0        | 0        | 8573500  | 5686700  | 0        | 1557600  | 12.325 |
| K7EMV3;K7E    | Histone H3;Histone H3.3C;Hist    | H3F3B;H3F | 1 | 1 | 1 | 1 | 1 | 1 | 4185000  | 12313000 | 18306000 | 13363000 | 2492900  | 3019300  | 6.7416 |
| K7ENJ4;K7ER   | ATP synthase subunit alpha, m    | ATP5A1    | 1 | 1 | 1 | 1 | 1 | 1 | 8057200  | 9287300  | 934860   | 1096900  | 768040   | 495760   | 5.8091 |
| K7ERE3;CON    | Keratin, type I cytoskeletal 13  | KRT13     | 2 | 2 | 2 | 2 | 1 | 1 | 10473000 | 18321000 | 3181300  | 2232400  | 1757600  | 3889600  | 15.539 |
| M0R1V3;M0     | Amino acid transporter;Excitat   | SLC1A6    | 0 | 1 | 0 | 0 | 0 | 0 | 0        | 0        | 0        | 0        | 0        | 0        | 6.4565 |



|             |                                  |          |    |    |    |    |    |    |           |            |           |           |          |          |        |
|-------------|----------------------------------|----------|----|----|----|----|----|----|-----------|------------|-----------|-----------|----------|----------|--------|
| M0R1V7;J3Q  | Ubiquitin-60S ribosomal protei   | UBA52;UB | 2  | 1  | 2  | 2  | 2  | 2  | 46177000  | 17982000   | 26376000  | 23765000  | 11452000 | 11454000 | 12.759 |
| O00522      | Krev interaction trapped prote   | KRIT1    | 0  | 0  | 1  | 0  | 0  | 1  | 0         | 0          | 35328000  | 0         | 0        | 19708000 | -2     |
| O14556      | Glyceraldehyde-3-phosphate d     | GAPDHS   | 1  | 1  | 1  | 1  | 1  | 1  | 15410000  | 6061500    | 4725900   | 4387400   | 2824600  | 2673600  | 8.3602 |
| O75844      | CAAX prenyl protease 1 homol     | ZMPSTE24 | 0  | 0  | 1  | 1  | 0  | 1  | 0         | 0          | 4200200   | 1197900   | 0        | 1144200  | 8.1821 |
| P00338;F5GX | L-lactate dehydrogenase A cha    | LDHA     | 1  | 2  | 2  | 2  | 1  | 2  | 3164700   | 7405900    | 43562000  | 19045000  | 4846700  | 21663000 | 25.196 |
| P00966;Q5T6 | Argininosuccinate synthase       | ASS1     | 4  | 3  | 5  | 3  | 5  | 5  | 18697000  | 27221000   | 46757000  | 30639000  | 52283000 | 26326000 | 35.369 |
| P04259      | Keratin, type II cytoskeletal 6B | KRT6B    | 1  | 1  | 1  | 1  | 1  | 1  | 16703000  | 19072000   | 33301000  | 28300000  | 14880000 | 8303500  | 6.0078 |
| P04264;CON  | Keratin, type II cytoskeletal 1  | KRT1     | 15 | 15 | 15 | 15 | 13 | 15 | 1.88E+10  | 1.7004E+10 | 1.577E+10 | 1.161E+10 | 1.47E+10 | 1.31E+10 | 323.31 |
| P04406;E7EU | Glyceraldehyde-3-phosphate d     | GAPDH    | 3  | 3  | 3  | 3  | 2  | 3  | 138030000 | 140300000  | 123480000 | 102470000 | 69063000 | 61098000 | 24.033 |
| P05089      | Arginase-1                       | ARG1     | 1  | 1  | 1  | 1  | 0  | 0  | 1000300   | 1469500    | 2970000   | 1160800   | 0        | 0        | 7.8575 |
| P05109      | Protein S100-A8;Protein S100-    | S100A8   | 1  | 1  | 1  | 1  | 1  | 0  | 8553400   | 0          | 5936900   | 10052000  | 1293200  | 0        | 12.193 |
| P06702      | Protein S100-A9                  | S100A9   | 1  | 1  | 1  | 1  | 1  | 1  | 32856000  | 15157000   | 22302000  | 21028000  | 14713000 | 7352300  | 11.634 |
| P06733;K7E  | Alpha-enolase;Enolase            | ENO1     | 3  | 3  | 3  | 3  | 2  | 3  | 57126000  | 57396000   | 52599000  | 21544000  | 27497000 | 28297000 | 24.55  |
| P06748      | Nucleophosmin                    | NPM1     | 1  | 1  | 1  | 1  | 1  | 1  | 3647200   | 1840300    | 8509600   | 2570200   | 5099000  | 5606000  | 6.3643 |
| P06756      | Integrin alpha-V;Integrin alpha  | ITGAV    | 1  | 0  | 0  | 0  | 1  | 0  | 4036500   | 0          | 0         | 0         | 3688400  | 0        | -2     |
| P07099      | Epoxide hydrolase 1              | EPHX1    | 0  | 0  | 2  | 2  | 1  | 0  | 0         | 0          | 21599000  | 13780000  | 2474800  | 0        | 12.304 |
| P07195      | L-lactate dehydrogenase B chai   | LDHB     | 1  | 0  | 1  | 1  | 1  | 1  | 2309400   | 0          | 6450200   | 7838900   | 5448200  | 2720100  | 6.424  |
| P07814;V9G  | Bifunctional glutamate/prolin    | EPRS     | 0  | 0  | 2  | 2  | 3  | 3  | 0         | 0          | 2633700   | 1286200   | 6396600  | 7138300  | 17.534 |
| P07900;Q58F | Heat shock protein HSP 90-alp    | HSP90AA1 | 3  | 4  | 5  | 5  | 4  | 5  | 20657000  | 8652400    | 123490000 | 83933000  | 1.09E+08 | 97610000 | 52.381 |
| P08238;Q58F | Heat shock protein HSP 90-bet    | HSP90AB1 | 1  | 2  | 2  | 2  | 1  | 3  | 25644000  | 7765100    | 35388000  | 3463900   | 10689000 | 38607000 | 45.375 |
| P10599      | Thioredoxin                      | TXN      | 1  | 2  | 1  | 2  | 1  | 2  | 15045000  | 6556800    | 9514000   | 3414900   | 8817900  | 8023500  | 12.238 |
| P10809      | 60 kDa heat shock protein, mit   | HSPD1    | 1  | 1  | 1  | 1  | 1  | 1  | 4883400   | 1491500    | 2502600   | 3332900   | 6567400  | 8115600  | 6.1154 |
| P11021      | 78 kDa glucose-regulated prot    | HSPA5    | 1  | 1  | 1  | 1  | 1  | 1  | 11643000  | 1068400    | 304160    | 6953000   | 5427800  | 5830500  | 6.1736 |
| P11498;E9PR | Pyruvate carboxylase, mitocho    | PC       | 2  | 0  | 6  | 9  | 10 | 11 | 1383500   | 0          | 35277000  | 20032000  | 93898000 | 1.56E+08 | 90.622 |
| P12273      | Prolactin-inducible protein      | PIP      | 1  | 0  | 0  | 1  | 1  | 0  | 5830200   | 0          | 0         | 4726000   | 3661900  | 0        | 7.1373 |

|             |                                  |           |    |    |    |    |    |    |           |           |           |           |          |          |        |
|-------------|----------------------------------|-----------|----|----|----|----|----|----|-----------|-----------|-----------|-----------|----------|----------|--------|
| P13639      | Elongation factor 2              | EEF2      | 3  | 3  | 4  | 3  | 3  | 3  | 9320800   | 3960900   | 23269000  | 17121000  | 25731000 | 22304000 | 23.768 |
| P13667      | Protein disulfide-isomerase A4   | PDIA4     | 0  | 0  | 1  | 0  | 0  | 0  | 0         | 0         | 0         | 0         | 0        | 0        | 5.8367 |
| P14625;F8VP | Endoplasmin                      | HSP90B1   | 0  | 2  | 3  | 4  | 4  | 5  | 0         | 2283900   | 12133000  | 10816000  | 12574000 | 10474000 | 29.621 |
| P14923;C9J8 | Junction plakoglobin             | JUP       | 5  | 6  | 7  | 7  | 3  | 5  | 45953000  | 56974000  | 12599000  | 21543000  | 17235000 | 45671000 | 53.098 |
| P15924      | Desmoplakin                      | DSP       | 27 | 26 | 27 | 27 | 22 | 24 | 271520000 | 237730000 | 217960000 | 90815000  | 1.19E+08 | 1.82E+08 | 246.72 |
| P16403;P104 | Histone H1.2;Histone H1.4;Hist   | HIST1H1C; | 2  | 3  | 3  | 3  | 3  | 3  | 12629000  | 34729000  | 44874000  | 23044000  | 17373000 | 46449000 | 19.056 |
| P17066;Q53F | Heat shock 70 kDa protein 6;He   | HSPA6;HS  | 1  | 1  | 1  | 1  | 1  | 1  | 6520500   | 13198000  | 22149000  | 23936000  | 12395000 | 10524000 | 7.427  |
| P20248      | Cyclin-A2                        | CCNA2     | 1  | 1  | 1  | 1  | 1  | 1  | 20603000  | 19626000  | 5800700   | 6710500   | 7265300  | 5316700  | 6.8413 |
| P22735      | Protein-glutamine gamma-glut     | TGM1      | 2  | 2  | 3  | 2  | 1  | 2  | 6009400   | 3727200   | 5197000   | 4135200   | 1570700  | 2553100  | 17.827 |
| P23490      | Loricrin                         | LOR       | 1  | 1  | 1  | 1  | 1  | 0  | 3037100   | 4651100   | 5771300   | 1355100   | 1505900  | 0        | 6.2985 |
| P25311      | Zinc-alpha-2-glycoprotein        | AZGP1     | 1  | 1  | 1  | 1  | 1  | 1  | 18646000  | 14987000  | 6752500   | 7406700   | 6977700  | 4638000  | 7.8529 |
| P26639      | Threonine--tRNA ligase, cytopl   | TARS      | 0  | 0  | 1  | 0  | 0  | 0  | 0         | 0         | 0         | 0         | 0        | 0        | 6.505  |
| P31327      | Carbamoyl-phosphate synthas      | CPS1      | 0  | 0  | 1  | 1  | 1  | 1  | 0         | 0         | 6060000   | 2021900   | 6478700  | 2477200  | 5.9865 |
| P31512      | Dimethylaniline monooxygena      | FMO4      | 0  | 1  | 1  | 1  | 1  | 1  | 0         | 0         | 3114000   | 1885400   | 816330   | 1947600  | 6.3974 |
| P31944      | Caspase-14;Caspase-14 subuni     | CASP14    | 2  | 3  | 3  | 3  | 3  | 3  | 20361000  | 15298000  | 26428000  | 10258000  | 10678000 | 15003000 | 30.053 |
| P32119      | Peroxiredoxin-2                  | PRDX2     | 0  | 1  | 1  | 1  | 2  | 1  | 0         | 2608800   | 1801700   | 1744300   | 5873300  | 4300100  | 11.649 |
| P35321;P225 | Cornifin-A;Cornifin-B            | SPRR1A;S  | 1  | 1  | 1  | 1  | 1  | 1  | 22175000  | 2253800   | 8586200   | 2819900   | 3746400  | 4135900  | 5.8848 |
| P37837      | Transaldolase                    | TALDO1    | 1  | 0  | 1  | 1  | 0  | 1  | 3492400   | 0         | 5191000   | 1721500   | 0        | 1879600  | 6.5089 |
| P47929      | Galectin-7                       | LGALS7    | 1  | 1  | 1  | 1  | 1  | 1  | 4390000   | 3300600   | 3962200   | 3395700   | 3033700  | 1039900  | 5.928  |
| P52179      | Myomesin-1                       | MYOM1     | 1  | 1  | 1  | 0  | 0  | 1  | 5145300   | 2694800   | 1026200   | 0         | 0        | 2030100  | 6.0104 |
| P55060      | Exportin-2                       | CSE1L     | 1  | 1  | 2  | 2  | 2  | 2  | 2687400   | 4441600   | 12262000  | 8558400   | 6646600  | 5557900  | 12.822 |
| P55072      | Transitional endoplasmic retic   | VCP       | 0  | 0  | 0  | 0  | 0  | 1  | 0         | 0         | 0         | 0         | 0        | 0        | 6.3811 |
| P61626;F8V  | Lysozyme C;Lysozyme              | LYZ       | 2  | 3  | 2  | 2  | 3  | 2  | 150250000 | 103620000 | 12687000  | 7816300   | 32595000 | 39050000 | 20.202 |
| P62805      | Histone H4                       | HIST1H4A  | 2  | 2  | 2  | 2  | 2  | 2  | 20159000  | 7656600   | 5299800   | 2431500   | 5821000  | 4440900  | 13.239 |
| P63261;P607 | Actin, cytoplasmic 2;Actin, cyto | ACTG1;AC  | 2  | 2  | 2  | 2  | 2  | 2  | 367640000 | 223950000 | 335800000 | 284630000 | 3.05E+08 | 3.84E+08 | 70.995 |

|             |                                 |           |   |   |   |   |   |   |           |           |           |          |          |          |        |
|-------------|---------------------------------|-----------|---|---|---|---|---|---|-----------|-----------|-----------|----------|----------|----------|--------|
| P63267;P681 | Actin, gamma-enteric smooth     | ACTG2;AC  | 1 | 1 | 1 | 1 | 0 | 0 | 63006000  | 31017000  | 677630    | 503720   | 0        | 0        | 5.8587 |
| P81605      | Dermcidin;Survival-promoting    | DCD       | 1 | 1 | 1 | 1 | 1 | 0 | 320970000 | 54964000  | 99085000  | 62960000 | 1.96E+08 | 0        | 7.9618 |
| Q02413      | Desmoglein-1                    | DSG1      | 6 | 6 | 4 | 5 | 6 | 5 | 53739000  | 44790000  | 18733000  | 15693000 | 25740000 | 23349000 | 40.812 |
| Q08188      | Protein-glutamine gamma-glut    | TGM3      | 2 | 2 | 2 | 2 | 2 | 2 | 19092000  | 24313000  | 25059000  | 11100000 | 14459000 | 9896300  | 14.284 |
| Q08554      | Desmocollin-1                   | DSC1      | 3 | 3 | 3 | 3 | 3 | 3 | 27877000  | 24858000  | 22028000  | 18428000 | 22833000 | 12809000 | 29.498 |
| Q13520      | Aquaporin-6                     | AQP6      | 1 | 1 | 1 | 1 | 1 | 1 | 14686000  | 12225000  | 10065000  | 5631200  | 9562900  | 3830900  | 5.9887 |
| Q16658;C9JF | Fascin                          | FSCN1     | 1 | 1 | 2 | 2 | 2 | 2 | 2250000   | 1085200   | 3632700   | 1044300  | 7484800  | 8255900  | 11.781 |
| Q3BDU5;P02  | Prelamin-A/C;Lamin-A/C          | LMNA      | 5 | 2 | 7 | 6 | 5 | 5 | 10310000  | 5182300   | 24023000  | 19074000 | 12157000 | 16104000 | 43.945 |
| Q5BQ95      |                                 | KLK13     | 1 | 1 | 1 | 1 | 1 | 1 | 150570000 | 116010000 | 15643000  | 12113000 | 20134000 | 9156100  | 6.0928 |
| Q5H8X8;O95  | Urotensin-2                     | UTS2      | 1 | 1 | 1 | 1 | 1 | 0 | 0         | 7339800   | 8357800   | 5641500  | 5845900  | 0        | 6.1458 |
| Q5JQ13;P18  | Vinculin                        | VCL       | 3 | 3 | 3 | 4 | 3 | 2 | 128320000 | 93315000  | 136550000 | 28714000 | 4032900  | 1.3E+08  | 28.659 |
| Q5JSD2;Q5JS | Voltage-dependent anion-sele    | VDAC2     | 0 | 0 | 2 | 2 | 2 | 2 | 0         | 0         | 109120000 | 39821000 | 31636000 | 38123000 | 14.065 |
| Q5JVH2;P05  | Propionyl-CoA carboxylase alp   | PCCA      | 0 | 0 | 0 | 1 | 1 | 1 | 0         | 0         | 0         | 1415600  | 3952300  | 3960500  | 6.9789 |
| Q5K684;P48  | Serpin B4;Serpin B3             | SERPINB3; | 2 | 2 | 3 | 3 | 2 | 2 | 8444100   | 17718000  | 62058000  | 26349000 | 5306400  | 7009200  | 20.195 |
| Q5ST81;A0A  | Tubulin beta-8 chain;Tubulin b  | TUBB;TUB  | 1 | 2 | 2 | 2 | 2 | 2 | 31184000  | 7388000   | 19281000  | 6174000  | 14417000 | 42636000 | 12.308 |
| Q5T749      | Keratinocyte proline-rich prot  | KPRP      | 3 | 2 | 3 | 2 | 3 | 2 | 111470000 | 60095000  | 29626000  | 37390000 | 45529000 | 18530000 | 21.892 |
| Q5T750      | Skin-specific protein 32        | XP32      | 1 | 1 | 1 | 0 | 0 | 0 | 12861000  | 11798000  | 7106500   | 0        | 0        | 0        | 6.5716 |
| Q5W0Q7      | SUMO-specific isopeptidase U    | USPL1     | 1 | 1 | 0 | 0 | 0 | 0 | 11386000  | 2223100   | 0         | 0        | 0        | 0        | 6.5064 |
| Q6ULP2      | Aftiphilin                      | AFTPH     | 1 | 1 | 1 | 1 | 1 | 0 | 5809000   | 3708800   | 2228400   | 425620   | 2306800  | 0        | 6.2246 |
| Q86T24      | Transcriptional regulator Kaiso | ZBTB33    | 0 | 1 | 0 | 1 | 0 | 1 | 0         | 5673600   | 0         | 1255900  | 0        | 2597600  | 6.1741 |
| Q8IWZ4      | Tripartite motif-containing pro | TRIM48    | 1 | 1 | 0 | 1 | 1 | 1 | 11726000  | 2159500   | 0         | 773520   | 6762200  | 7045800  | 5.9824 |
| Q8N5V2      | Ephexin-1                       | NGEF      | 1 | 1 | 1 | 1 | 1 | 0 | 1990700   | 6254800   | 4526700   | 846060   | 890740   | 0        | -2     |
| Q8N7G0      | POU domain, class 5, transcript | POU5F2    | 1 | 1 | 1 | 1 | 1 | 1 | 29591000  | 8978300   | 279750    | 10427000 | 27696000 | 25621000 | -2     |
| Q8TF72      | Protein Shroom3                 | SHROOM3   | 1 | 1 | 1 | 1 | 1 | 1 | 183010000 | 81307000  | 24869000  | 7792400  | 2.37E+08 | 2.04E+08 | 6.3338 |
| Q9NY15      | Stabilin-1                      | STAB1     | 0 | 1 | 1 | 0 | 1 | 1 | 0         | 6005700   | 2730000   | 0        | 1837900  | 1271500  | 6.482  |

|            |                                  |          |   |   |   |   |   |   |          |          |          |          |          |          |        |
|------------|----------------------------------|----------|---|---|---|---|---|---|----------|----------|----------|----------|----------|----------|--------|
| Q9NY74     | Ewings tumor-associated antigen  | ETAA1    | 1 | 1 | 1 | 1 | 1 | 0 | 10733000 | 3115400  | 2913000  | 204890   | 1474300  | 0        | 6.0458 |
| Q9NZT1     | Calmodulin-like protein 5        | CALML5   | 1 | 1 | 1 | 1 | 1 | 1 | 8044800  | 12102000 | 9004100  | 7667500  | 4019200  | 5527000  | 6.2622 |
| R4GN62;A0A | Partitioning defective 3 homolog | PARD3B   | 1 | 1 | 1 | 1 | 1 | 1 | 9279300  | 6568300  | 5611900  | 6606400  | 3258500  | 18481000 | 6.7918 |
| V9GZ37;A0A | Heat shock 70 kDa protein 1B;H   | HSPA1A;H | 1 | 1 | 1 | 1 | 1 | 1 | 11909000 | 8482400  | 18515000 | 12840000 | 22970000 | 9851700  | 18.546 |
|            |                                  |          |   |   |   |   |   |   |          |          |          |          |          |          |        |

## References

- [1]. Z. Li, P. Hao, L. Li, C. Y. Tan, X. Cheng, G. Y. J. Chen, S. Kwan Sze, Han-Ming Shen and S. Q. Yao, *Angew. Chem. Int. Ed.*, 2013, **52**, 8551-8556.
- [2]. Z. Li, D. Wang, L. Li, S. Pan, Z. Na, C. Y. Tan and S. Q. Yao, *J. Am. Chem. Soc.*, 2014, 136, 9990-9998.
- [3]. Z. Li, L. Qian, L. Li, J. C. Bernhammer, H. V. Huynh, J. S. Lee and S. Q. Yao, *Angew. Chem. Int. Ed.* 2016, **55**, 2002–2006.
- [4]. A. Herner, J. Marjanovic, T. M. Lewandowski, V. Marin, M. Patterson, L. Miesbauer, D. Ready, J. Williams, A. Vasudevan, Q. Lin, *J. Am. Chem. Soc.*, 2016, **138**, 14609–14615.
- [5]. S. Ito, Y. Tanaka, A. Kakehi, K.-I., Kondo, *Bull. Chem. Soc. Jpn*, 1976, **49**, 1920-1923
- [6]. B. P. Fors, J. E. Poelma, M. S. Menyo, M. J. Robb, D. M. Spokoyny and J. W. Kramer, *J. Am. Chem. Soc.*, 2013, **135**, 14106-14109.
- [7]. Y. Liu, J. Zhou, L. Wang, X. Hu, X. Liu, M. Liu, Zehui Cao, D. Shangguan and W. Tan., *J. Am. Chem. Soc.*, 2016, **138**, 12368-12374.
- [8]. J. E. Elias, S. P. Gygi, *Nat Methods* 2007, **4**, 207-214.
- [9]. J. Cox, M. Mann, *Nat Biotechnol* 2008, **26**, 1367-1372.
- [10]. J. Cox, N. Neuhauser, A. Michalski, R. A. Scheltema, *et al.*, *J. Proteome Res.* 2011, **10**, 1794-1805.

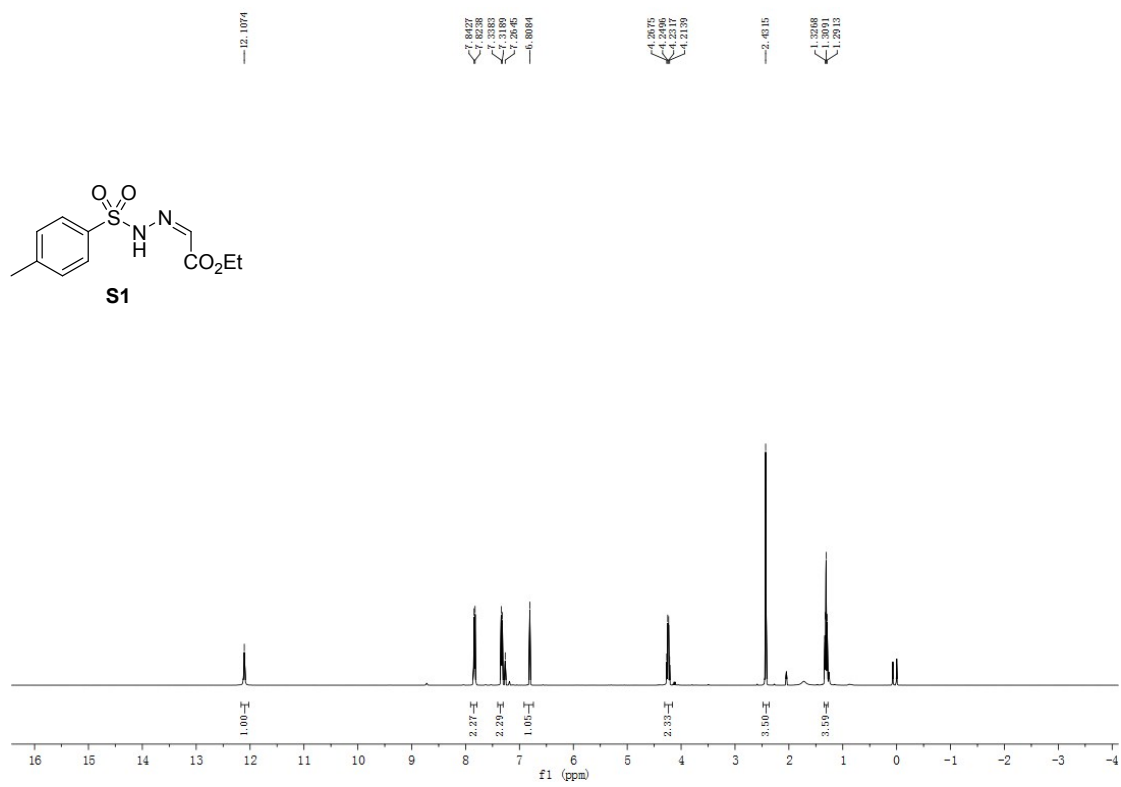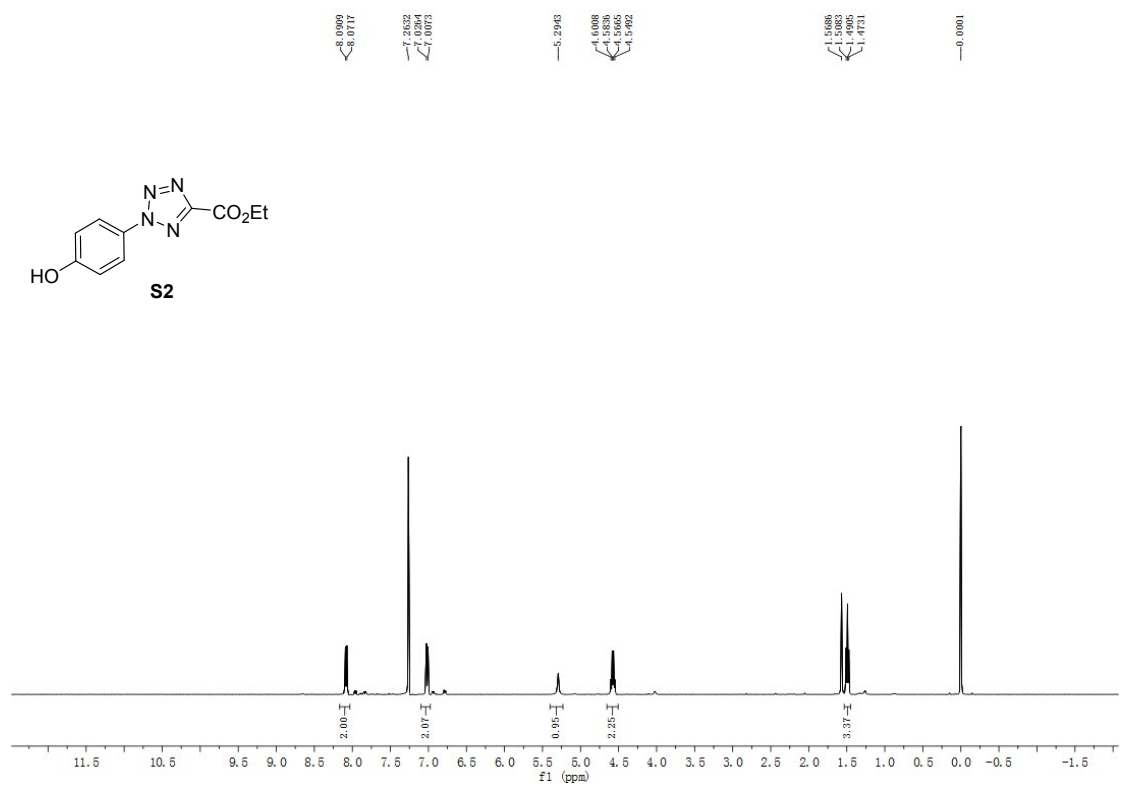

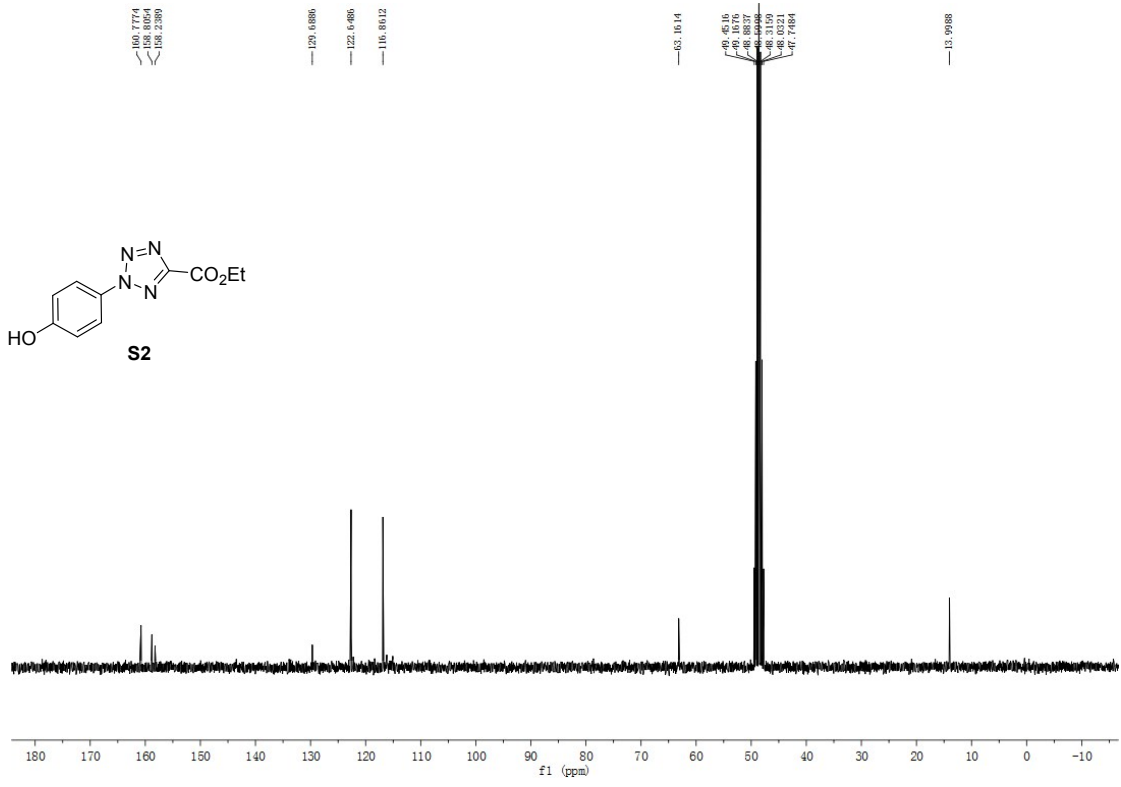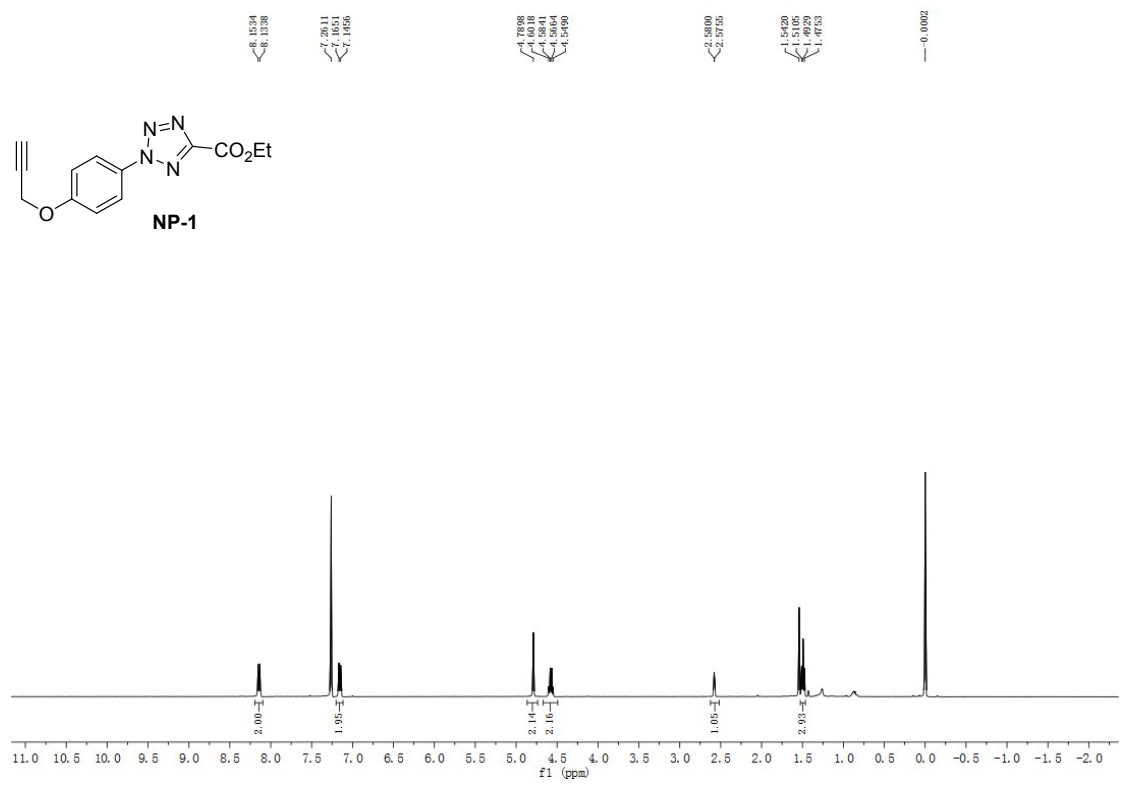

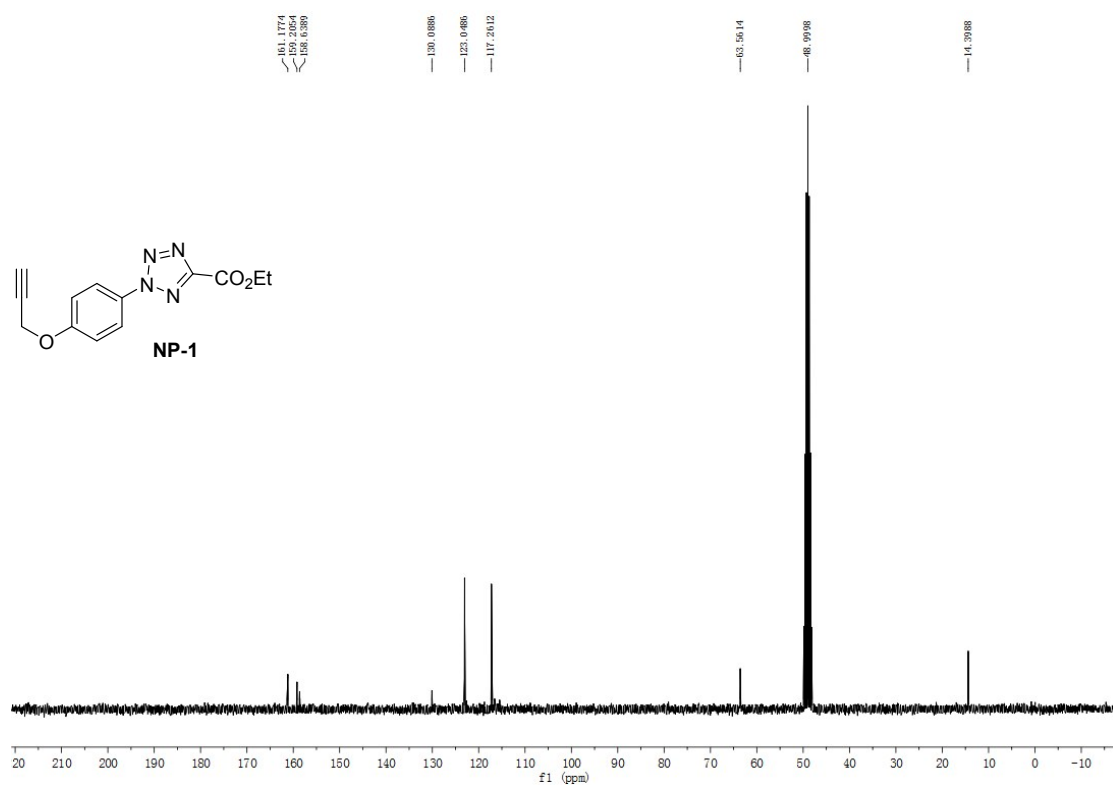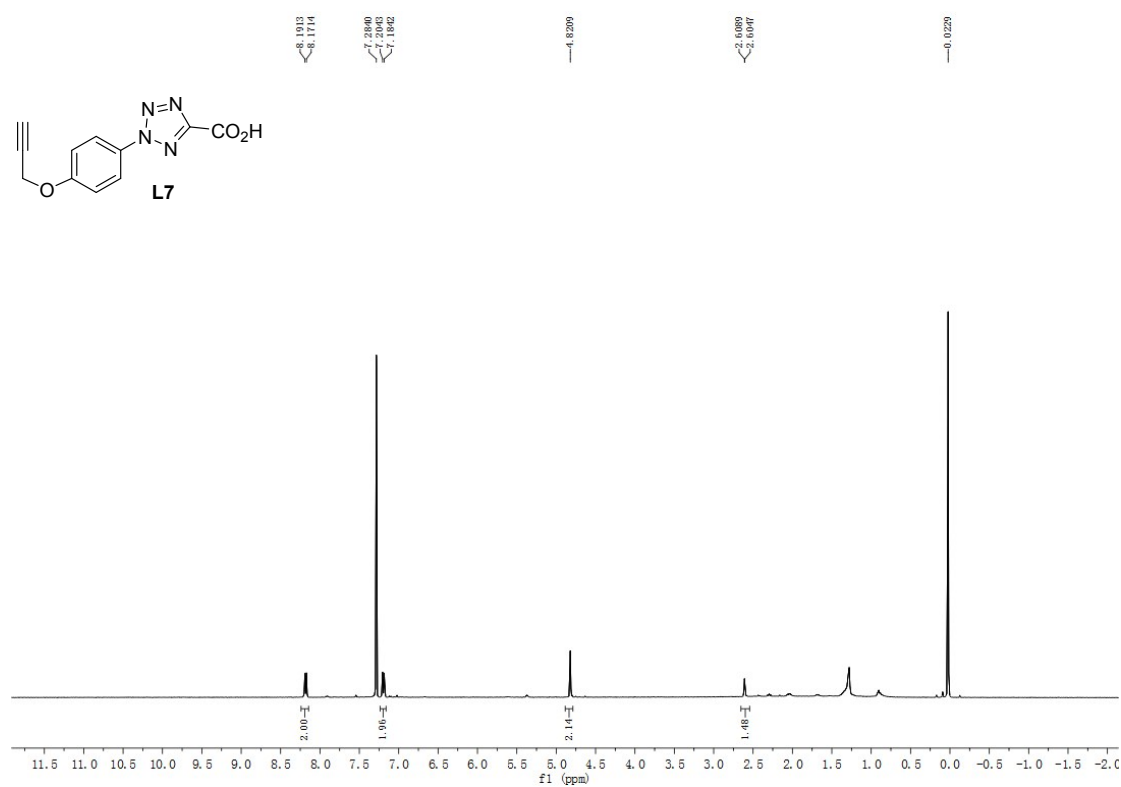

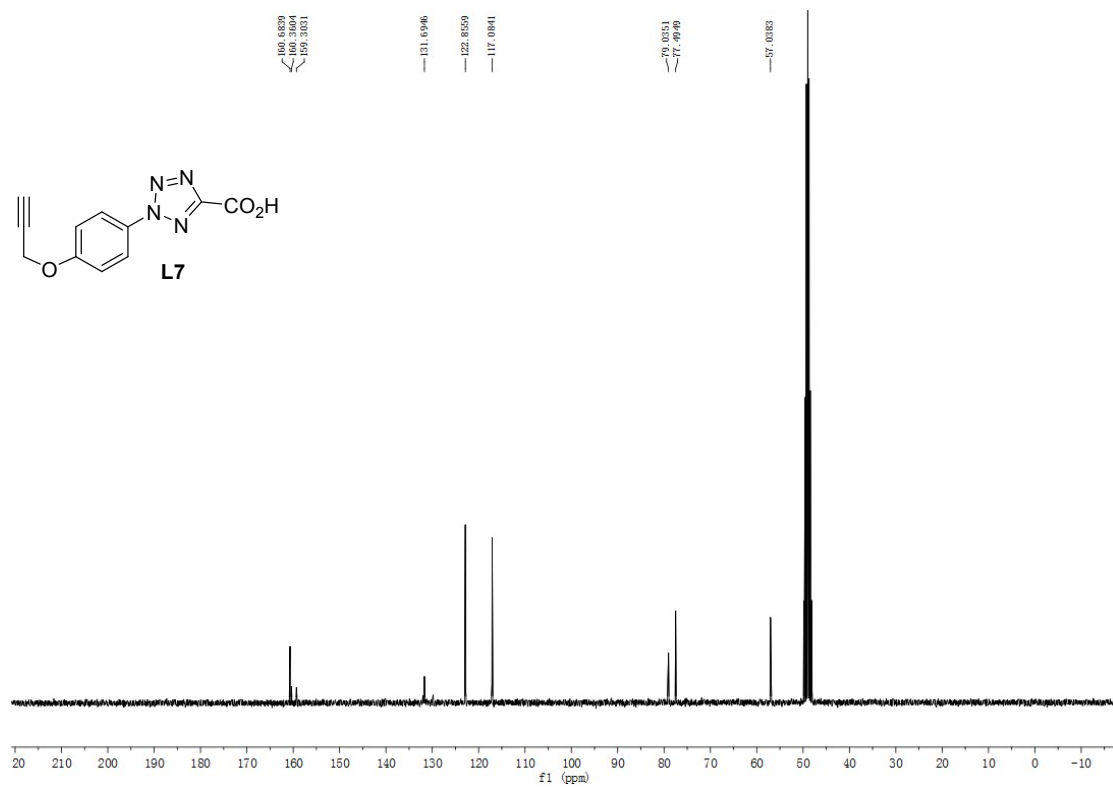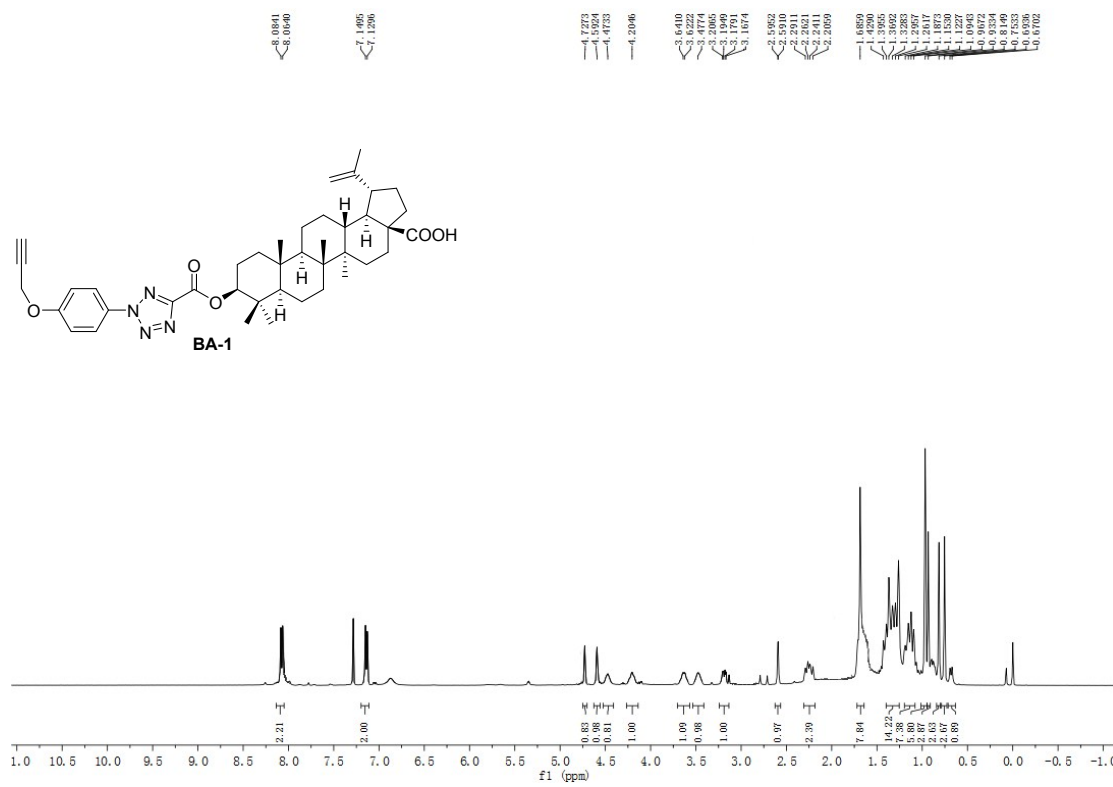



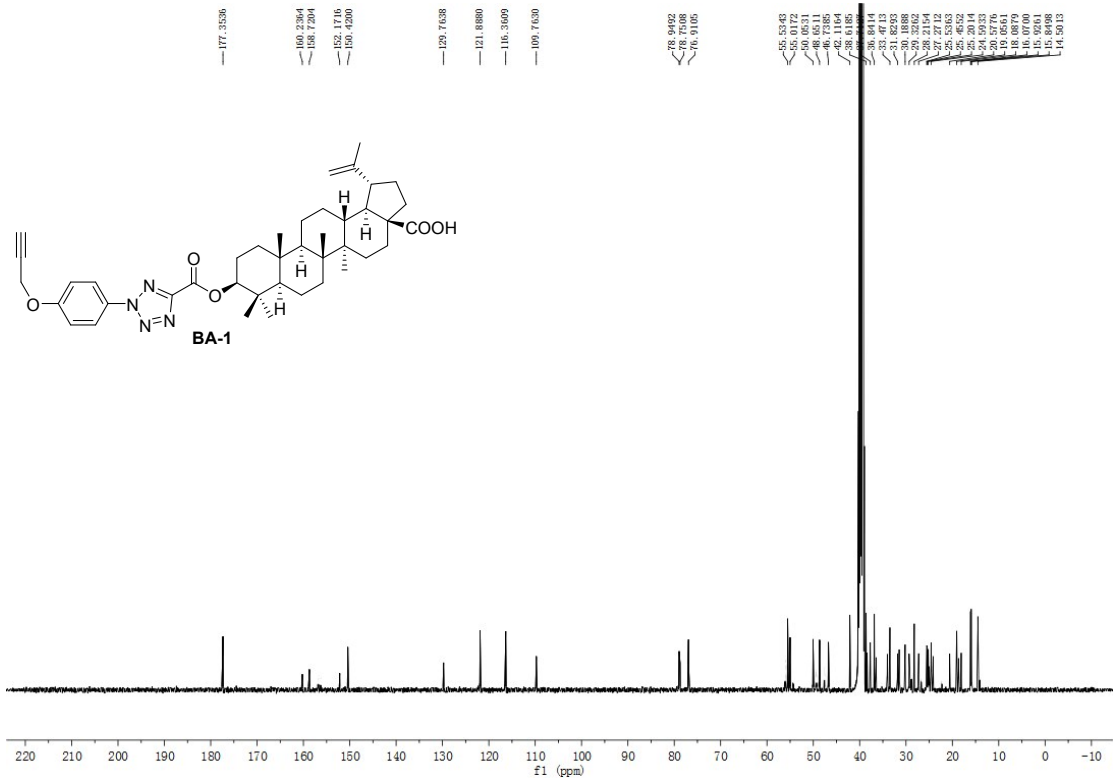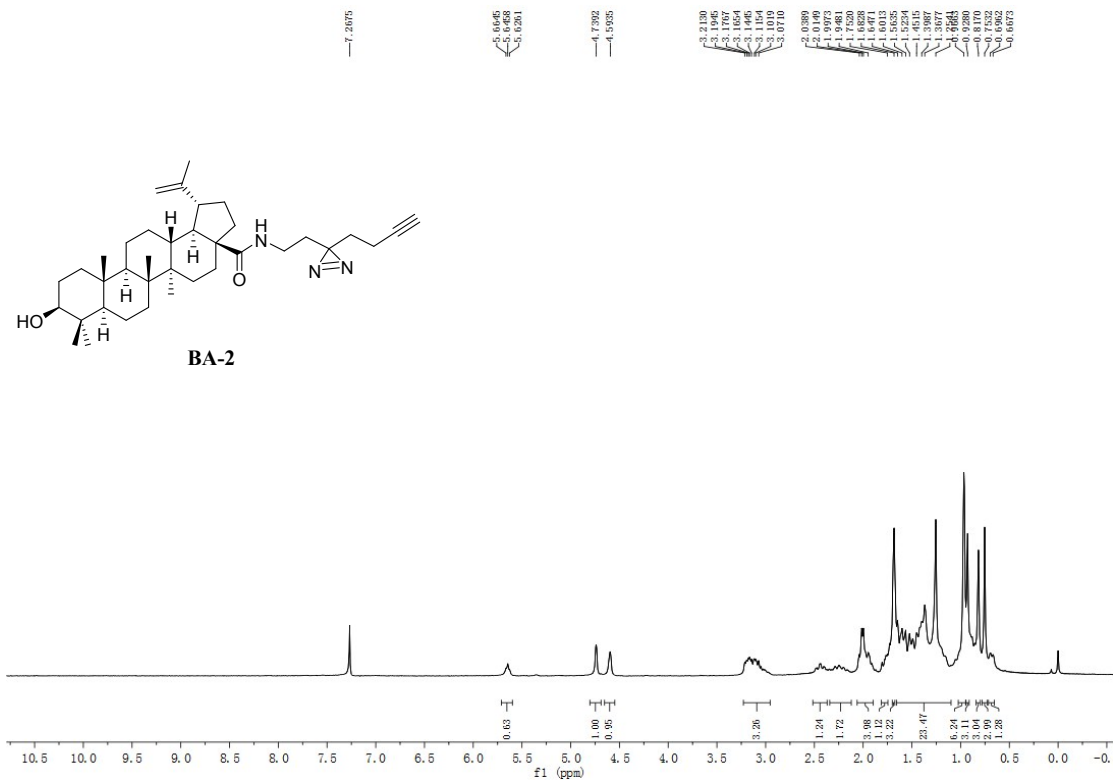

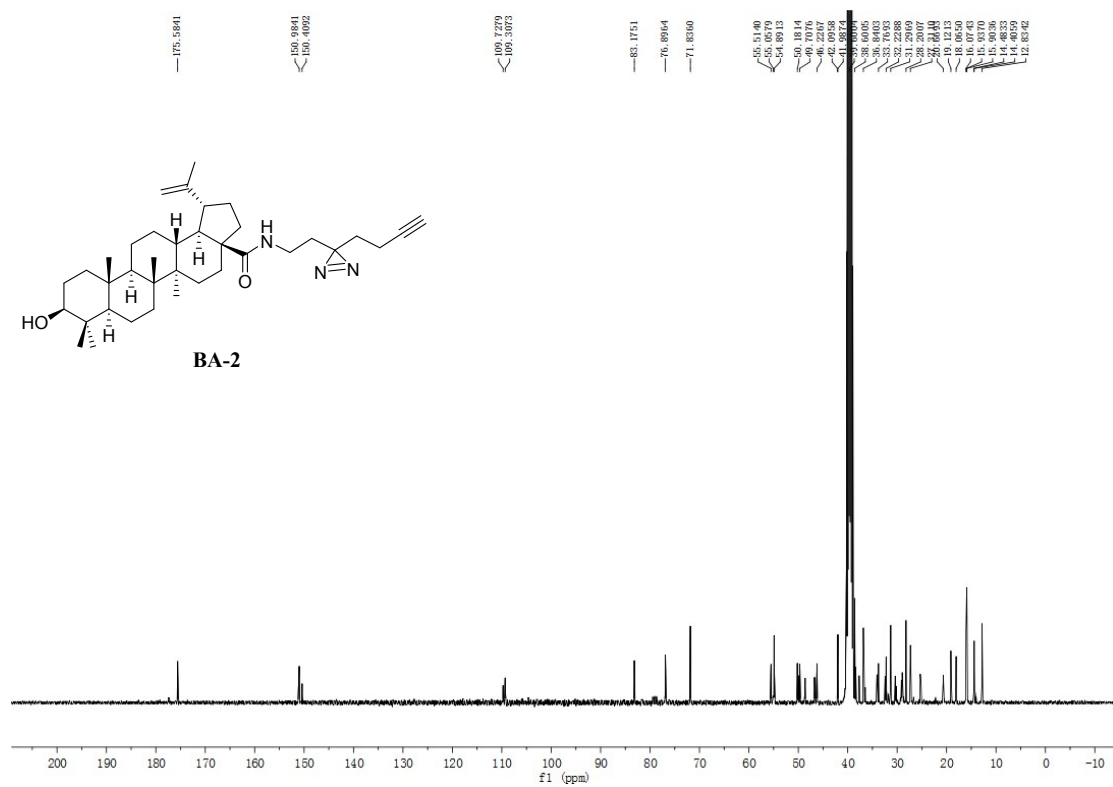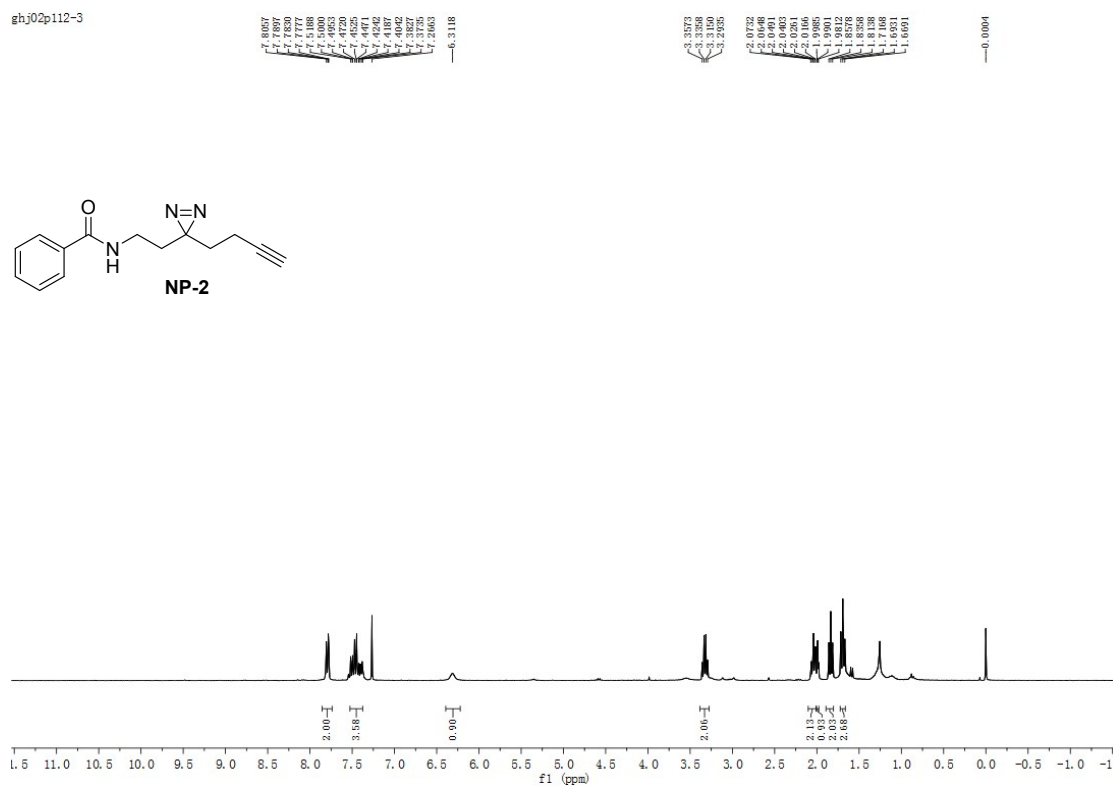

ghj02p112-3

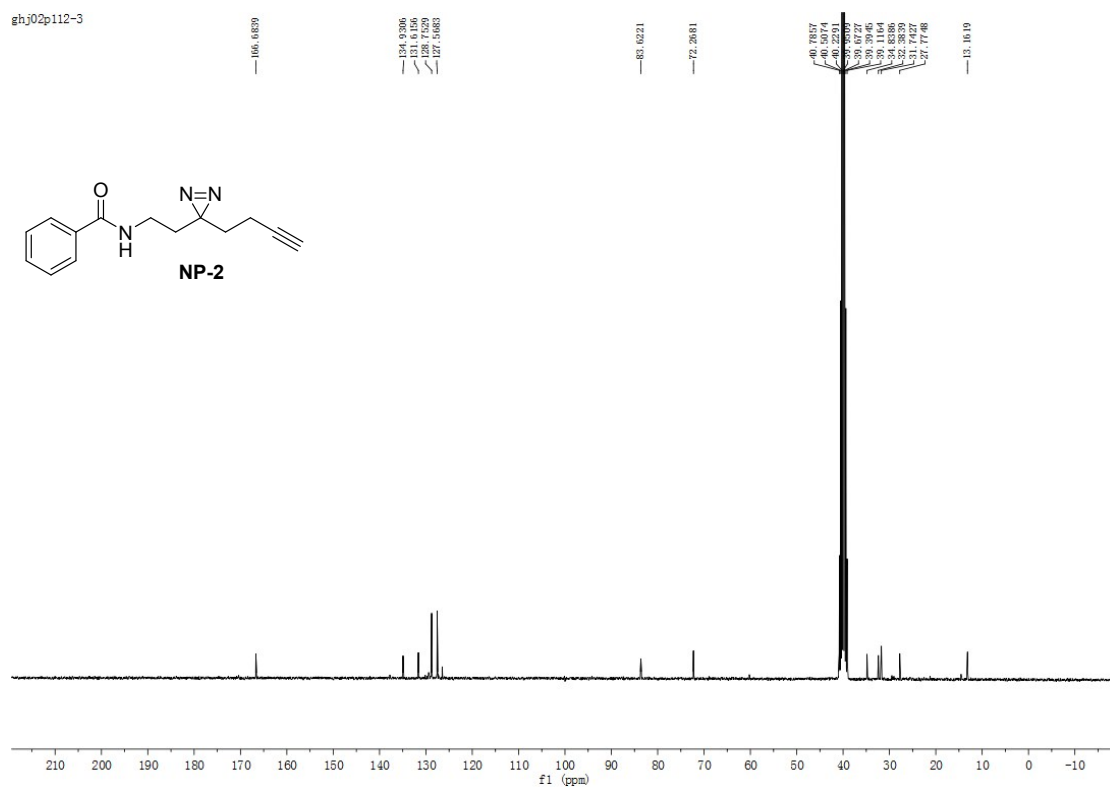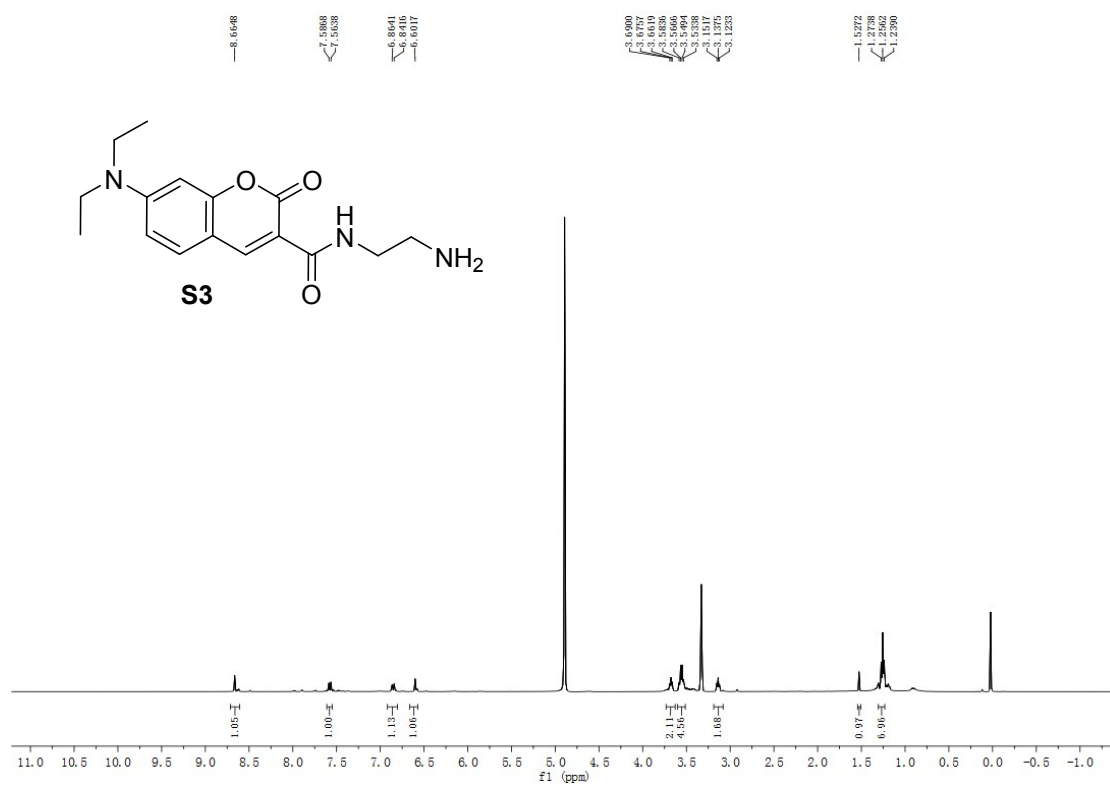

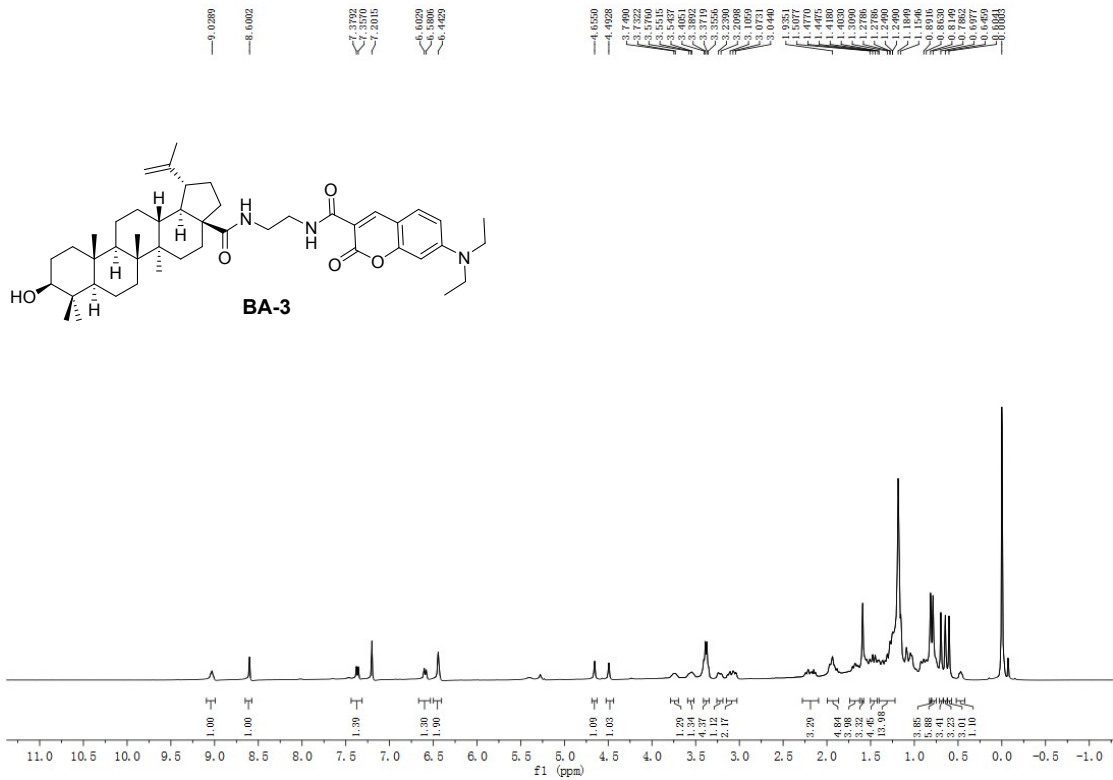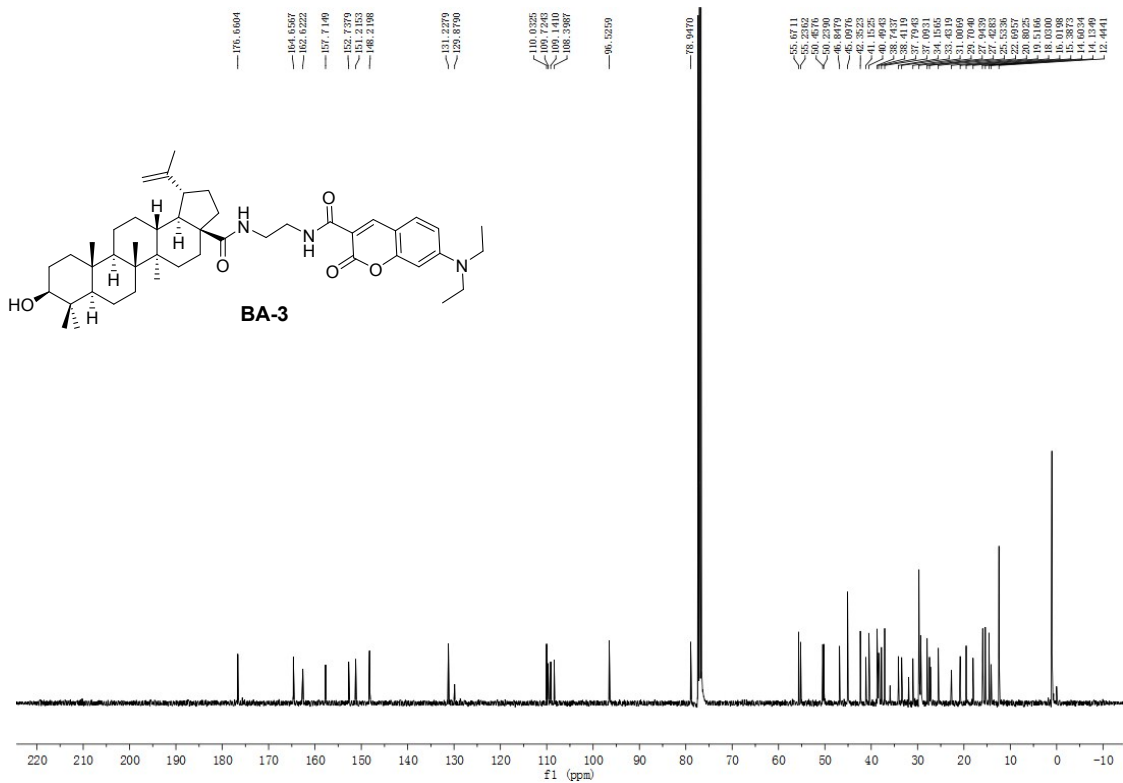

Supplement: c7cc04190j1.pdf [file c7cc04190j1.pdf]
